# Supplementary material for: Gene Expression and Early Radiation Response of Two Distinct Neuroblastoma Cell Lines
Source: Research Square preprint supplement (doi:10.21203/rs.3.rs-1720457/v3), 2022-09-13
Supplement: Supplementary file 1 [file 122c6f66c15725979191ba33.xlsx]

## Sheet: RitnerEtAl-CompareCells-CTR-int
Table S4. Control transfected cells, genes suppressed or induced by radiation
Genes suppressed by irradiation, upregulated in control transfected SK-N-AS cells vs SK-N-DZ cells								AS vs DZ w/o IR
logFC	AveExpr	t	P.Value	adj.P.Val	B	SYMBOL	GENENAME	ENSEMBL
0.930385	9.68514	7.70121	4.24111e-09	8.68661e-09	10.0167	MBTPS2	membrane bound transcription factor peptidase, site 2	ENSG00000012174
0.903273	8.34275	10.4944	1.84162e-12	1.05531e-11	17.8502	LOC112268259	uncharacterized LOC112268259	NA
0.894258	8.95753	6.18261	4.08473e-07	5.95204e-07	5.42418	TSNAX	translin associated factor X	ENSG00000116918
0.86942	7.52612	7.64802	4.9599e-09	9.91981e-09	9.85883	LOC107986022	uncharacterized LOC107986022	NA
0.856682	7.03526	8.14242	1.17133e-09	2.70307e-09	11.3155	ZNF284	zinc finger protein 284	ENSG00000186026
0.856211	8.89924	7.9787	1.88334e-09	4.15803e-09	10.836	TPP1	tripeptidyl peptidase 1	ENSG00000166340
0.845976	6.3802	5.76104	1.48653e-06	1.98985e-06	4.13258	SNRPCP19	small nuclear ribonucleoprotein polypeptide C pseudogene 19	NA
0.833309	7.61152	6.22246	3.61619e-07	5.36103e-07	5.5462	USP12PX	USP12 pseudogene X-linked	NA
0.820827	5.64867	5.6743	1.93981e-06	2.50456e-06	3.867	LOC107986018	uncharacterized LOC107986018	NA
0.819881	9.56767	7.51239	7.40315e-09	1.44107e-08	9.45499	RHOBTB3	Rho related BTB domain containing 3	ENSG00000164292
0.814114	8.22421	9.98431	7.02926e-12	3.28892e-11	16.4925	GNPNAT1	glucosamine-phosphate N-acetyltransferase 1	ENSG00000100522
0.796059	9.40679	7.07673	2.71286e-08	4.82076e-08	8.14693	LOC644387	myelin protein zero like 1 pseudogene	NA
0.793402	7.27247	13.8197	6.61974e-16	1.87559e-14	25.8958	NRG1	neuregulin 1	ENSG00000157168
0.789865	7.9993	8.04832	1.53841e-09	3.47163e-09	11.0402	SLC30A1	solute carrier family 30 member 1	ENSG00000170385
0.788712	6.96647	8.17381	1.06977e-09	2.49124e-09	11.4071	LIG4	DNA ligase 4	ENSG00000174405
0.785921	7.21893	7.58323	6.00444e-09	1.19154e-08	9.66611	ACAD11	acyl-CoA dehydrogenase family member 11	ENSG00000240303
0.783402	9.83077	8.55	3.64034e-10	9.72027e-10	12.4965	SPCS3	signal peptidase complex subunit 3	ENSG00000129128
0.776843	6.80511	10.2293	3.67843e-12	1.91428e-11	17.1488	C1orf74	chromosome 1 open reading frame 74	ENSG00000162757
0.775331	8.65492	10.1554	4.46828e-12	2.30184e-11	16.9516	DPY19L1	dpy-19 like C-mannosyltransferase 1	ENSG00000173852
0.767477	7.22711	7.93975	2.10962e-09	4.59788e-09	10.7214	ZC3H11B	zinc finger CCCH-type containing 11B	ENSG00000215817
0.760676	8.99034	6.08449	5.51507e-07	7.87868e-07	5.12363	MDM4	MDM4 regulator of p53	ENSG00000198625
0.76061	5.8049	5.56321	2.7276e-06	3.47769e-06	3.52719	RNU4-36P	RNA, U4 small nuclear 36, pseudogene	ENSG00000201164
0.751897	6.48001	4.93342	1.87183e-05	2.1214e-05	1.61414	LOC107983995	uncharacterized LOC107983995	NA
0.751703	7.67301	7.00917	3.32317e-08	5.82411e-08	7.94276	SNX7	sorting nexin 7	ENSG00000162627
0.751492	7.02413	8.95801	1.15317e-10	3.58609e-10	13.6593	FAM86C2P	family with sequence similarity 86, member A pseudogene	ENSG00000160172
0.750715	8.45898	6.13776	4.68538e-07	6.78847e-07	5.28682	UBA6	ubiquitin like modifier activating enzyme 6	ENSG00000033178
0.750133	8.5284	5.89527	9.84837e-07	1.36116e-06	4.5438	IBTK	inhibitor of Bruton tyrosine kinase	ENSG00000005700
0.748462	6.57197	5.33922	5.42045e-06	6.55078e-06	2.84358	TRBV29OR9-2	T cell receptor beta variable 29/OR9-2 (non-functional)	ENSG00000223394
0.748233	7.22196	7.8297	2.90929e-09	6.15659e-09	10.397	PRMT9	protein arginine methyltransferase 9	ENSG00000164169
0.746699	8.08149	5.73656	1.6025e-06	2.12438e-06	4.0576	TMEM106B	transmembrane protein 106B	ENSG00000106460
0.745977	7.5369	9.61841	1.8762e-11	7.36048e-11	15.4978	ZNF623	zinc finger protein 623	ENSG00000183309
0.745881	5.74117	5.85919	1.10006e-06	1.50411e-06	4.43324	RPL39P29	ribosomal protein L39 pseudogene 29	NA
0.742143	8.21094	8.434	5.06663e-10	1.29848e-09	12.1623	TIMM8A	translocase of inner mitochondrial membrane 8A	ENSG00000126953
0.73889	6.96315	9.70223	1.49601e-11	6.00762e-11	15.7272	SCYL3	SCY1 like pseudokinase 3	ENSG00000000457
0.737617	8.67247	10.1317	4.75735e-12	2.37868e-11	16.8881	SLC35B4	solute carrier family 35 member B4	ENSG00000205060
0.736805	6.86523	8.60709	3.09562e-10	8.488e-10	12.6604	MKRN9P	makorin ring finger protein 9, pseudogene	NA
0.735128	9.17316	10.8532	7.32575e-13	4.85212e-12	18.7849	TIPRL	TOR signaling pathway regulator	ENSG00000143155
0.731276	7.56211	10.0398	6.06584e-12	2.87053e-11	16.6418	RCOR3	REST corepressor 3	ENSG00000117625
0.729696	7.4938	9.17694	6.27724e-11	2.10664e-10	14.2748	ZNF234	zinc finger protein 234	ENSG00000263002
0.728168	7.1039	4.98053	1.6218e-05	1.8587e-05	1.75607	SNORD53	small nucleolar RNA, C/D box 53	ENSG00000265145
0.72729	8.4663	10.9171	6.22721e-13	4.41094e-12	18.9497	CD47	CD47 molecule	ENSG00000196776
0.726793	6.64029	8.62079	2.97771e-10	8.25344e-10	12.6997	TAFA2	TAFA chemokine like family member 2	ENSG00000198673
0.726638	7.53681	12.2941	2.13122e-14	3.19683e-13	22.3734	LNX2	ligand of numb-protein X 2	ENSG00000139517
0.724712	8.18212	7.76978	3.46757e-09	7.18886e-09	10.2199	ZHX1	zinc fingers and homeoboxes 1	ENSG00000165156
0.724529	7.06186	11.1764	3.23855e-13	2.62168e-12	19.6128	DLC1	DLC1 Rho GTPase activating protein	ENSG00000164741
0.723508	6.7396	9.03339	9.34661e-11	2.96073e-10	13.8719	PCDH7	protocadherin 7	ENSG00000169851
0.723013	9.76534	10.7395	9.79338e-13	6.24328e-12	18.4905	RAB10	RAB10, member RAS oncogene family	ENSG00000084733
0.721686	7.10869	10.3657	2.57387e-12	1.39646e-11	17.5108	USP40	ubiquitin specific peptidase 40	ENSG00000085982
0.719405	9.33822	7.98061	1.87296e-09	4.15308e-09	10.8415	MOB1A	MOB kinase activator 1A	ENSG00000114978
0.719017	6.3689	4.64464	4.48913e-05	4.92356e-05	0.750234	SNORA74D	small nucleolar RNA, H/ACA box 74D	ENSG00000252213
0.71814	7.61124	7.09188	2.59235e-08	4.62273e-08	8.19266	ARHGAP26	Rho GTPase activating protein 26	ENSG00000145819
0.71812	7.38662	8.68643	2.4729e-10	7.08528e-10	12.8876	TTC13	tetratricopeptide repeat domain 13	ENSG00000143643
0.716442	6.93567	8.35612	6.33144e-10	1.55992e-09	11.9371	ZNF772	zinc finger protein 772	ENSG00000197128
0.715199	7.31557	6.8924	4.72346e-08	8.00321e-08	7.58912	SNORD58C	small nucleolar RNA, C/D box 58C	NA
0.714185	6.53049	11.9085	5.35426e-14	6.20608e-13	21.4387	NBEAL1	neurobeachin like 1	ENSG00000144426
0.712107	8.28386	7.81684	3.02088e-09	6.36632e-09	10.359	MYD88	MYD88 innate immune signal transduction adaptor	ENSG00000172936
0.711941	7.54364	11.063	4.30543e-13	3.27727e-12	19.324	ARHGAP12	Rho GTPase activating protein 12	ENSG00000165322
0.711203	7.83045	9.71659	1.43926e-11	5.82556e-11	15.7663	PIGM	phosphatidylinositol glycan anchor biosynthesis class M	ENSG00000143315
0.710419	9.78452	8.38903	5.76192e-10	1.44757e-09	12.0323	TMEM123	transmembrane protein 123	ENSG00000152558
0.710169	6.43982	4.87679	2.22345e-05	2.50322e-05	1.44385	HSPB1P1	heat shock protein family B (small) member 1 pseudogene 1	NA
0.708195	7.4251	9.16967	6.40464e-11	2.12102e-10	14.2545	ZNF252P	zinc finger protein 252, pseudogene	ENSG00000196922
0.707567	5.94781	3.65345	0.000823269	0.000849934	-2.08981	NOTCH2NLC	notch 2 N-terminal like C	ENSG00000286219
0.7056	8.7833	7.53059	7.01513e-09	1.37604e-08	9.50926	USO1	USO1 vesicle transport factor	ENSG00000138768
0.704541	8.63479	6.59803	1.15134e-07	1.81229e-07	6.69395	CD46	CD46 molecule	ENSG00000117335
0.704406	6.08804	3.4342	0.00152058	0.00154789	-2.67968	LOC105374515	uncharacterized LOC105374515	NA
0.70325	7.64123	7.18761	1.9461e-08	3.57018e-08	8.48128	LMBRD2	LMBR1 domain containing 2	ENSG00000164187
0.701479	7.68802	9.22031	5.56879e-11	1.91149e-10	14.3961	USP25	ubiquitin specific peptidase 25	ENSG00000155313
0.701209	8.71891	8.41715	5.31655e-10	1.35572e-09	12.1137	BAG2	BAG cochaperone 2	ENSG00000112208
0.699356	6.69795	4.48613	7.22827e-05	7.86017e-05	0.281385	CDRT15P9	CDRT15 pseudogene 9	NA
0.698787	7.72852	7.06863	2.77965e-08	4.92229e-08	8.12246	EOGT	EGF domain specific O-linked N-acetylglucosamine transferase	ENSG00000163378
0.698536	6.12445	13.2347	2.42793e-15	4.76248e-14	24.5774	HPSE	heparanase	ENSG00000173083
0.697493	7.9364	6.97742	3.65617e-08	6.36398e-08	7.8467	TRMT1L	tRNA methyltransferase 1 like	ENSG00000121486
0.694984	6.90459	4.54772	6.00905e-05	6.56235e-05	0.463068	LINC00997	long intergenic non-protein coding RNA 997	NA
0.694957	6.32413	7.33755	1.24406e-08	2.36743e-08	8.93191	LOC100129503	uncharacterized LOC100129503	ENSG00000280351
0.692068	7.87925	7.93089	2.16479e-09	4.69805e-09	10.6954	KIAA1109	KIAA1109	ENSG00000138688
0.691308	6.08012	7.35753	1.17224e-08	2.23911e-08	8.99182	COX6CP17	cytochrome c oxidase subunit 6C pseudogene 17	NA
0.690422	7.51091	11.5811	1.18759e-13	1.23606e-12	20.6305	ZNF551	zinc finger protein 551	ENSG00000204519
0.688173	7.1424	11.7619	7.63557e-14	8.46552e-13	21.0786	YAP1	Yes1 associated transcriptional regulator	ENSG00000137693
0.687512	8.18865	10.0779	5.48312e-12	2.6381e-11	16.7442	TUBGCP3	tubulin gamma complex associated protein 3	ENSG00000126216
0.687083	8.42685	17.274	6.30478e-19	1.60772e-16	32.9466	TMCO3	transmembrane and coiled-coil domains 3	ENSG00000150403
0.686707	8.90441	6.82974	5.70683e-08	9.54257e-08	7.39899	WDR3	WD repeat domain 3	ENSG00000065183
0.686489	6.17333	4.78294	2.9556e-05	3.284e-05	1.16257	GOLGA8J	golgin A8 family member J	ENSG00000179938
0.685613	8.47907	8.8596	1.51877e-10	4.58326e-10	13.3807	SDE2	SDE2 telomere maintenance homolog	ENSG00000143751
0.6856	6.8991	8.28696	7.72172e-10	1.84886e-09	11.7365	ELAC1	elaC ribonuclease Z 1	ENSG00000141642
0.685578	8.13942	8.29792	7.48217e-10	1.79996e-09	11.7683	DCAF5	DDB1 and CUL4 associated factor 5	ENSG00000139990
0.685348	8.60413	7.66622	4.70111e-09	9.47654e-09	9.91288	PSMD5	proteasome 26S subunit, non-ATPase 5	ENSG00000095261
0.684676	8.7599	10.3513	2.67271e-12	1.43482e-11	17.4726	AHCTF1	AT-hook containing transcription factor 1	ENSG00000153207
0.683609	7.97948	6.96509	3.79449e-08	6.55997e-08	7.80935	KIF14	kinesin family member 14	ENSG00000118193
0.683466	9.43267	9.25845	5.01312e-11	1.783e-10	14.5025	DR1	down-regulator of transcription 1	ENSG00000117505
0.682528	8.39897	8.49637	4.24071e-10	1.10911e-09	12.3422	B3GALNT2	beta-1,3-N-acetylgalactosaminyltransferase 2	ENSG00000162885
0.682246	5.52022	3.78012	0.0005741	0.000601214	-1.74143	USP12PY	USP12 pseudogene Y-linked	NA
0.681359	6.94767	9.73168	1.38192e-11	5.68368e-11	15.8075	NCOA7	nuclear receptor coactivator 7	ENSG00000111912
0.680669	8.60357	7.15433	2.14987e-08	3.91583e-08	8.38104	HJURP	Holliday junction recognition protein	ENSG00000123485
0.67945	8.52607	7.79919	3.18119e-09	6.6492e-09	10.3069	PCYOX1	prenylcysteine oxidase 1	ENSG00000116005
0.677782	8.38812	9.02812	9.48465e-11	2.98591e-10	13.8571	AHCTF1P1	AT-hook containing transcription factor 1 pseudogene 1	NA
0.677351	8.40852	10.5009	1.81082e-12	1.04945e-11	17.8673	RAB3GAP2	RAB3 GTPase activating non-catalytic protein subunit 2	ENSG00000118873
0.675983	8.25121	5.72799	1.64519e-06	2.15974e-06	4.03136	ZNF330	zinc finger protein 330	ENSG00000109445
0.674863	5.10369	5.90163	9.65801e-07	1.33847e-06	4.5633	MIR3606	microRNA 3606	ENSG00000284180
0.673281	8.97092	10.8751	6.92829e-13	4.71124e-12	18.8415	SLC39A9	solute carrier family 39 member 9	ENSG00000029364
0.672997	7.57867	7.21343	1.80152e-08	3.34101e-08	8.55901	GPR180	G protein-coupled receptor 180	ENSG00000152749
0.672435	5.70485	6.86978	5.05701e-08	8.4838e-08	7.52052	IFITM4P	interferon induced transmembrane protein 4 pseudogene	ENSG00000235821
0.672266	8.46079	10.5697	1.51565e-12	9.31035e-12	18.0477	DNAJC13	DnaJ heat shock protein family (Hsp40) member C13	ENSG00000138246
0.671668	7.0358	12.1918	2.71662e-14	3.64598e-13	22.1271	SLC25A30	solute carrier family 25 member 30	ENSG00000174032
0.671454	5.83199	6.14484	4.58493e-07	6.66186e-07	5.30852	LOC107986532	FAM10 family protein At4g22670	NA
0.671449	8.61833	7.75767	3.59303e-09	7.41881e-09	10.184	ERCC5	ERCC excision repair 5, endonuclease	ENSG00000134899
0.669214	6.01975	5.47077	3.62182e-06	4.48332e-06	3.24476	LINC01109	long intergenic non-protein coding RNA 1109	NA
0.66884	7.66549	2.69494	0.0106601	0.0106601	-4.51678	LOC653631	axin interactor, dorsalization associated pseudogene	NA
0.668833	7.41131	12.1927	2.71048e-14	3.64598e-13	22.1294	TMTC2	transmembrane O-mannosyltransferase targeting cadherins 2	ENSG00000179104
0.667273	6.5646	5.20996	8.05137e-06	9.43954e-06	2.45045	IGHV3-41	immunoglobulin heavy variable 3-41 (pseudogene)	ENSG00000278473
0.666373	5.71091	9.47502	2.76971e-11	1.04633e-10	15.1033	LOC254028	uncharacterized LOC254028	ENSG00000258573
0.666292	6.47536	6.52904	1.41986e-07	2.22126e-07	6.48353	MIR4653	microRNA 4653	ENSG00000264425
0.665824	6.21395	5.50292	3.28175e-06	4.09215e-06	3.34294	EGLN1P1	egl-9 family hypoxia inducible factor 1 pseudogene 1	NA
0.665767	6.65403	4.69626	3.84155e-05	4.24987e-05	0.903821	IGHVII-43-1	immunoglobulin heavy variable (II)-43-1 (pseudogene)	ENSG00000283195
0.665612	7.98221	6.37305	2.28328e-07	3.45541e-07	6.007	LOC100288211	PPPDE peptidase domain containing 1 pseudogene	NA
0.665268	7.25556	10.5215	1.71682e-12	1.00641e-11	17.9213	C1QTNF1	C1q and TNF related 1	ENSG00000173918
0.663467	7.55932	10.9013	6.48146e-13	4.47092e-12	18.9091	KLHL5	kelch like family member 5	ENSG00000109790
0.663391	8.01329	8.66803	2.60497e-10	7.42199e-10	12.8349	GDAP2	ganglioside induced differentiation associated protein 2	ENSG00000196505
0.662305	6.46236	9.75409	1.30107e-11	5.4389e-11	15.8686	PPP1R26-AS1	PPP1R26 antisense RNA 1	ENSG00000225361
0.662237	7.22935	11.4761	1.53771e-13	1.53771e-12	20.3684	ACVR1	activin A receptor type 1	ENSG00000115170
0.66189	7.7673	11.232	2.81772e-13	2.43565e-12	19.754	ST3GAL6	ST3 beta-galactoside alpha-2,3-sialyltransferase 6	ENSG00000064225
0.659384	7.79719	8.1078	1.29473e-09	2.96105e-09	11.2144	PKD2	polycystin 2, transient receptor potential cation channel	ENSG00000118762
0.659026	8.62583	9.11698	7.41042e-11	2.39197e-10	14.1068	ADSS2	adenylosuccinate synthase 2	ENSG00000035687
0.656652	7.48078	7.94627	2.06988e-09	4.53065e-09	10.7406	SCP2	sterol carrier protein 2	ENSG00000116171
0.654924	7.53568	5.85923	1.09991e-06	1.50411e-06	4.43339	RAB3IP	RAB3A interacting protein	ENSG00000127328
0.652723	5.34046	4.1409	0.000201449	0.000213152	-0.722949	LOC105370314	uncharacterized LOC105370314	NA
0.652699	8.38624	6.41034	2.03794e-07	3.11182e-07	6.12099	ERO1A	endoplasmic reticulum oxidoreductase 1 alpha	ENSG00000197930
0.652441	7.45136	6.44983	1.80695e-07	2.77574e-07	6.24164	PIGF	phosphatidylinositol glycan anchor biosynthesis class F	ENSG00000151665
0.650726	9.68304	6.08823	5.45234e-07	7.81094e-07	5.13508	ABCE1	ATP binding cassette subfamily E member 1	ENSG00000164163
0.65071	7.59705	15.1855	3.67841e-17	1.87599e-15	28.827	TMEM165	transmembrane protein 165	ENSG00000134851
0.650646	5.95311	6.20219	3.84726e-07	5.65447e-07	5.48416	LOC107986363	uncharacterized LOC107986363	NA
0.650244	7.44707	9.12816	7.1843e-11	2.33375e-10	14.1382	BTBD19	BTB domain containing 19	ENSG00000222009
0.650011	7.31704	15.6663	1.39118e-17	1.01357e-15	29.8126	ERAP1	endoplasmic reticulum aminopeptidase 1	ENSG00000164307
0.648157	6.55421	12.7019	8.20538e-15	1.36395e-13	23.3418	PPIEL	peptidylprolyl isomerase E like pseudogene	ENSG00000243970
0.645464	8.0371	5.92033	9.11982e-07	1.27079e-06	4.62061	METTL7A	methyltransferase like 7A	ENSG00000185432
0.642681	8.41235	13.5086	1.31491e-15	3.19336e-14	25.1996	TOR1AIP1	torsin 1A interacting protein 1	ENSG00000143337
0.642381	6.59929	6.79459	6.3465e-08	1.05088e-07	7.29222	PCDHGB7	protocadherin gamma subfamily B, 7	ENSG00000254122
0.641406	7.72017	11.1424	3.52676e-13	2.81039e-12	19.5264	PPIE	peptidylprolyl isomerase E	ENSG00000084072
0.641313	8.00386	9.66937	1.63474e-11	6.46293e-11	15.6373	C18orf25	chromosome 18 open reading frame 25	ENSG00000152242
0.639982	7.30192	10.5606	1.55173e-12	9.31035e-12	18.0238	PRRG1	proline rich and Gla domain 1	ENSG00000130962
0.639817	8.12907	5.30756	5.97239e-06	7.11663e-06	2.74718	ZNF480	zinc finger protein 480	ENSG00000198464
0.639181	8.89992	6.33808	2.54037e-07	3.81056e-07	5.90003	SMIM15	small integral membrane protein 15	ENSG00000188725
0.636306	7.01034	8.32838	6.8556e-10	1.6729e-09	11.8567	LOC339803	uncharacterized LOC339803	ENSG00000212978
0.635712	6.95954	10.7965	8.46364e-13	5.46387e-12	18.6385	MAP3K21	mitogen-activated protein kinase kinase kinase 21	ENSG00000143674
0.635707	7.09478	15.8027	1.06026e-17	9.01225e-16	30.0879	FAM149B1	family with sequence similarity 149 member B1	ENSG00000138286
0.635618	9.06129	5.28374	6.4242e-06	7.63716e-06	2.67471	CDC27P1	cell division cycle 27 pseudogene 1	NA
0.635601	7.61711	7.41036	1.00188e-08	1.92089e-08	9.15005	SNHG25	small nucleolar RNA host gene 25	ENSG00000266402
0.635201	8.0342	8.55086	3.6315e-10	9.72027e-10	12.499	DHRS7	dehydrogenase/reductase 7	ENSG00000100612
0.634999	9.00516	8.60834	3.08464e-10	8.488e-10	12.664	HPS3	HPS3 biogenesis of lysosomal organelles complex 2 subunit 1	ENSG00000163755
0.632547	6.70238	13.9249	5.26175e-16	1.57852e-14	26.1288	PGPEP1	pyroglutamyl-peptidase I	ENSG00000130517
0.632296	10.4258	10.1185	4.92534e-12	2.429e-11	16.8529	PTPN11	protein tyrosine phosphatase non-receptor type 11	ENSG00000179295
0.630812	5.93873	15.4801	2.02169e-17	1.16814e-15	29.4337	PRKG1	protein kinase cGMP-dependent 1	ENSG00000185532
0.630691	11.3205	9.82087	1.08749e-11	4.70018e-11	16.0503	RAC1	Rac family small GTPase 1	ENSG00000136238
0.630567	8.01238	4.96319	1.70972e-05	1.95068e-05	1.7038	ODR4	odr-4 GPCR localization factor homolog	ENSG00000157181
0.630434	8.43981	9.7759	1.22699e-11	5.1716e-11	15.928	SLC30A5	solute carrier family 30 member 5	ENSG00000145740
0.629675	7.92503	6.56101	1.28837e-07	2.02174e-07	6.58106	TAB3	TGF-beta activated kinase 1 (MAP3K7) binding protein 3	ENSG00000157625
0.629237	6.97852	7.12525	2.3455e-08	4.24187e-08	8.29337	NCEH1	neutral cholesterol ester hydrolase 1	ENSG00000144959
0.62869	7.56972	7.11375	2.42778e-08	4.35974e-08	8.25867	BAG5	BAG cochaperone 5	ENSG00000166170
0.628529	6.35643	11.2858	2.46434e-13	2.20493e-12	19.89	MPP4	membrane palmitoylated protein 4	ENSG00000082126
0.628246	7.28498	10.9949	5.11338e-13	3.77946e-12	19.1496	ZNF224	zinc finger protein 224	ENSG00000267680
0.628082	8.29052	11.3925	1.89039e-13	1.78537e-12	20.1589	RRAS2	RAS related 2	ENSG00000133818
0.626942	9.62835	5.54321	2.90024e-06	3.66119e-06	3.46604	AZIN1	antizyme inhibitor 1	ENSG00000155096
0.626876	7.97694	6.82457	5.79669e-08	9.66116e-08	7.38329	PEX11B	peroxisomal biogenesis factor 11 beta	ENSG00000131779
0.626379	7.12757	9.25691	5.03437e-11	1.783e-10	14.4982	MIGA1	mitoguardin 1	ENSG00000180488
0.625716	7.84147	5.17937	8.84082e-06	1.02707e-05	2.35759	EXTL2	exostosin like glycosyltransferase 2	ENSG00000162694
0.625179	8.63822	5.72834	1.64341e-06	2.15974e-06	4.03244	WASHC4	WASH complex subunit 4	ENSG00000136051
0.624857	7.94045	5.3424	5.36797e-06	6.50276e-06	2.85326	NOC3L	NOC3 like DNA replication regulator	ENSG00000173145
0.624034	7.89701	11.3537	2.08147e-13	1.89562e-12	20.0612	DPY19L3	dpy-19 like C-mannosyltransferase 3	ENSG00000178904
0.623858	8.57368	12.4766	1.38681e-14	2.14325e-13	22.8093	CSTF2	cleavage stimulation factor subunit 2	ENSG00000101811
0.623282	7.03356	5.97004	7.83093e-07	1.09418e-06	4.77293	BIRC2	baculoviral IAP repeat containing 2	ENSG00000110330
0.621587	7.01798	8.71977	2.25074e-10	6.52203e-10	12.9828	WDR17	WD repeat domain 17	ENSG00000150627
0.621219	8.78077	8.07676	1.41659e-09	3.21094e-09	11.1235	CACNA2D1	calcium voltage-gated channel auxiliary subunit alpha2delta 1	ENSG00000153956
0.620738	8.00931	8.14026	1.17866e-09	2.70774e-09	11.3092	NEK2	NIMA related kinase 2	ENSG00000117650
0.62057	10.253	7.71724	4.04596e-09	8.32033e-09	10.0643	VMP1	vacuole membrane protein 1	ENSG00000062716
0.61963	7.56252	9.79527	1.16477e-11	4.95029e-11	15.9807	KLHL12	kelch like family member 12	ENSG00000117153
0.619397	7.98441	7.46244	8.58386e-09	1.65825e-08	9.30583	RSRP1	arginine and serine rich protein 1	ENSG00000117616
0.618974	7.40238	9.16188	6.54407e-11	2.15321e-10	14.2327	UTP23	UTP23 small subunit processome component	ENSG00000147679
0.618239	6.53075	14.8032	8.09979e-17	3.44241e-15	28.0266	ENTPD5	ectonucleoside triphosphate diphosphohydrolase 5 (inactive)	ENSG00000187097
0.617887	5.48413	8.49709	4.23192e-10	1.10911e-09	12.3443	TMEM108-AS1	TMEM108 antisense RNA 1	NA
0.617212	7.76761	8.65521	2.70112e-10	7.59726e-10	12.7983	SPRED1	sprouty related EVH1 domain containing 1	ENSG00000166068
0.615199	7.38402	11.8885	5.61947e-14	6.36874e-13	21.3896	TMF1	TATA element modulatory factor 1	ENSG00000144747
0.615152	6.82569	11.7366	8.12082e-14	8.81195e-13	21.0161	SLC39A8	solute carrier family 39 member 8	ENSG00000138821
0.614998	5.91268	5.97665	7.67389e-07	1.07815e-06	4.79319	LOC728755	uncharacterized LOC728755	ENSG00000258932
0.61458	8.3624	8.85376	1.54385e-10	4.63154e-10	13.3641	TRAPPC11	trafficking protein particle complex 11	ENSG00000168538
0.613726	6.33362	7.03098	3.11232e-08	5.49234e-08	8.00871	METTL7B	methyltransferase like 7B	ENSG00000170439
0.613696	8.46772	5.32241	5.70679e-06	6.88053e-06	2.7924	WASF2	WASP family member 2	ENSG00000158195
0.612793	8.71608	6.99377	3.48068e-08	6.07927e-08	7.89618	TRIO	trio Rho guanine nucleotide exchange factor	ENSG00000038382
0.612275	7.84918	7.69125	4.36723e-09	8.89487e-09	9.98719	PLK2	polo like kinase 2	ENSG00000145632
0.611931	8.15036	4.92498	1.92052e-05	2.17176e-05	1.58873	RPE	ribulose-5-phosphate-3-epimerase	ENSG00000197713
0.611475	7.13069	9.46206	2.86932e-11	1.07599e-10	15.0675	NABP1	nucleic acid binding protein 1	ENSG00000173559
0.611291	7.32832	4.19971	0.000169415	0.000180003	-0.553721	GSKIP	GSK3B interacting protein	ENSG00000100744
0.611133	6.71484	2.9424	0.00568748	0.00573244	-3.9313	GPR183	G protein-coupled receptor 183	ENSG00000169508
0.611064	7.15676	9.8244	1.07725e-11	4.6957e-11	16.0599	TMEM50B	transmembrane protein 50B	ENSG00000142188
0.611	9.19697	10.2303	3.66904e-12	1.91428e-11	17.1514	UBE4A	ubiquitination factor E4A	ENSG00000110344
0.609713	8.10898	4.9483	1.78896e-05	2.032e-05	1.65895	NME7	NME/NM23 family member 7	ENSG00000143156
0.608576	8.44374	6.79307	6.37563e-08	1.05229e-07	7.28761	MALSU1	mitochondrial assembly of ribosomal large subunit 1	ENSG00000156928
0.608199	9.16943	10.8312	7.74702e-13	5.06536e-12	18.7282	IQGAP1	IQ motif containing GTPase activating protein 1	ENSG00000140575
0.60755	6.67767	10.1164	4.95326e-12	2.429e-11	16.8472	FAM149B1P1	family with sequence similarity 149, member B2	ENSG00000214424
0.607294	6.14131	14.8576	7.23306e-17	3.35351e-15	28.1414	LMO7	LIM domain 7	ENSG00000136153
0.607131	8.93268	4.95305	1.76329e-05	2.00732e-05	1.67326	SELENOI	selenoprotein I	ENSG00000138018
0.60711	6.35574	10.9174	6.22173e-13	4.41094e-12	18.9506	AP1S3	adaptor related protein complex 1 subunit sigma 3	ENSG00000152056
0.607081	8.12974	4.98398	1.60487e-05	1.84343e-05	1.76646	METTL14	methyltransferase like 14	ENSG00000145388
0.606746	7.60104	7.23229	1.70279e-08	3.18103e-08	8.61576	RIPK2	receptor interacting serine/threonine kinase 2	ENSG00000104312
0.606738	7.06406	4.97553	1.64669e-05	1.88299e-05	1.74099	TGDS	TDP-glucose 4,6-dehydratase	ENSG00000088451
0.60649	7.75346	7.92521	2.20097e-09	4.73625e-09	10.6786	PCNX2	pecanex 2	ENSG00000135749
0.606003	8.30332	6.18641	4.03747e-07	5.90003e-07	5.43583	FKBP9	FKBP prolyl isomerase 9	ENSG00000122642
0.605764	5.97531	4.86186	2.32656e-05	2.61353e-05	1.39903	LOC107984292	uncharacterized LOC107984292	NA
0.605226	6.91035	4.31739	0.000119573	0.000127578	-0.212659	SNORA26	small nucleolar RNA, H/ACA box 26	ENSG00000212588
0.605166	8.0422	8.6539	2.71118e-10	7.59726e-10	12.7945	ATG16L1	autophagy related 16 like 1	ENSG00000085978
0.604798	7.47026	6.04718	6.18252e-07	8.73431e-07	5.00933	HERC4	HECT and RLD domain containing E3 ubiquitin protein ligase 4	ENSG00000148634
0.604295	7.65848	5.8627	1.08827e-06	1.49601e-06	4.44401	WDR35	WD repeat domain 35	ENSG00000118965
0.603931	7.79567	10.039	6.07876e-12	2.87053e-11	16.6397	ABCB10	ATP binding cassette subfamily B member 10	ENSG00000135776
0.603675	7.08999	7.57262	6.19548e-09	1.22469e-08	9.63453	PTPN21	protein tyrosine phosphatase non-receptor type 21	ENSG00000070778
0.603081	8.89722	7.20839	1.82884e-08	3.37937e-08	8.54386	SLC30A6	solute carrier family 30 member 6	ENSG00000152683
0.603026	8.40508	11.2173	2.92315e-13	2.48468e-12	19.7168	PPP2R5C	protein phosphatase 2 regulatory subunit B'gamma	ENSG00000078304
0.602938	9.5746	6.94428	4.03983e-08	6.96052e-08	7.74633	NAA15	N-alpha-acetyltransferase 15, NatA auxiliary subunit	ENSG00000164134
0.602745	7.8592	9.60366	1.95267e-11	7.54442e-11	15.4573	RPS6KC1	ribosomal protein S6 kinase C1	ENSG00000136643
0.602103	7.94677	6.24375	3.38838e-07	5.03812e-07	5.61138	BIVM	basic, immunoglobulin-like variable motif containing	ENSG00000134897
0.601296	8.12492	8.36222	6.22167e-10	1.54032e-09	11.9548	PCID2	PCI domain containing 2	ENSG00000126226
0.601034	8.33374	7.64946	4.93898e-09	9.91686e-09	9.8631	VIPAS39	VPS33B interacting protein, apical-basolateral polarity regulator, spe-39 homolog	ENSG00000151445
0.600398	7.56673	7.19371	1.91089e-08	3.51825e-08	8.49967	ROR1	receptor tyrosine kinase like orphan receptor 1	ENSG00000185483
0.600361	5.43705	4.40688	9.16065e-05	9.87723e-05	0.04866	LOC107984919	uncharacterized LOC107984919	NA
0.599429	5.93954	11.5352	1.32928e-13	1.35587e-12	20.5161	KDELR3	KDEL endoplasmic reticulum protein retention receptor 3	ENSG00000100196
0.599069	7.97827	8.92753	1.2557e-10	3.83477e-10	13.5731	USP38	ubiquitin specific peptidase 38	ENSG00000170185
0.598091	8.88755	4.41683	8.89257e-05	9.62889e-05	0.0778176	IGHV4-4	immunoglobulin heavy variable 4-4	ENSG00000276775
0.597973	6.96258	9.1745	6.31968e-11	2.10664e-10	14.268	PCDHB9	protocadherin beta 9	ENSG00000177839
0.596872	7.08185	8.40552	5.49625e-10	1.38767e-09	12.0801	C8orf31	chromosome 8 open reading frame 31	ENSG00000177335
0.596611	6.91915	3.77178	0.000587963	0.00061447	-1.76453	FPGT	fucose-1-phosphate guanylyltransferase	ENSG00000254685
0.595815	5.52785	5.22396	7.71386e-06	9.10664e-06	2.49297	LOC105370451	uncharacterized LOC105370451	NA
0.595054	8.17911	9.60768	1.93151e-11	7.51963e-11	15.4683	RIOX2	ribosomal oxygenase 2	ENSG00000170854
0.595002	8.33952	6.73268	7.65381e-08	1.24313e-07	7.10401	COG2	component of oligomeric golgi complex 2	ENSG00000135775
0.594991	9.06483	5.23856	7.377e-06	8.72917e-06	2.53732	GNPAT	glyceronephosphate O-acyltransferase	ENSG00000116906
0.594656	6.92911	6.05763	5.98786e-07	8.50643e-07	5.04133	MAP9	microtubule associated protein 9	ENSG00000164114
0.594585	7.01131	9.35718	3.82221e-11	1.3825e-10	14.7771	HYAL1	hyaluronidase 1	ENSG00000114378
0.593867	5.75336	6.02132	6.69223e-07	9.42827e-07	4.93008	CALCRL	calcitonin receptor like receptor	ENSG00000064989
0.593723	8.18027	2.93583	0.00578505	0.00581928	-3.94725	TXNIP	thioredoxin interacting protein	ENSG00000265972
0.593211	8.55646	6.75936	7.0601e-08	1.15406e-07	7.18514	SHCBP1	SHC binding and spindle associated 1	ENSG00000171241
0.592943	7.92724	8.47428	4.51628e-10	1.17516e-09	12.2786	NDFIP2	Nedd4 family interacting protein 2	ENSG00000102471
0.592393	7.92071	7.8802	2.50991e-09	5.37838e-09	10.5461	NEK1	NIMA related kinase 1	ENSG00000137601
0.591946	11.4714	5.52086	3.10604e-06	3.89209e-06	3.39775	RAB7A	RAB7A, member RAS oncogene family	ENSG00000075785
0.591041	5.8572	9.22959	5.42808e-11	1.90919e-10	14.422	NHLRC1	NHL repeat containing E3 ubiquitin protein ligase 1	ENSG00000187566
0.590132	8.9062	5.69332	1.82983e-06	2.37459e-06	3.92523	PRPS2	phosphoribosyl pyrophosphate synthetase 2	ENSG00000101911
0.588874	5.72678	11.0754	4.173e-13	3.22459e-12	19.3557	CCL28	C-C motif chemokine ligand 28	ENSG00000151882
0.587703	5.93225	7.10787	2.47093e-08	4.42167e-08	8.24093	L1TD1P1	LINE-1 type transposase domain containing 1 pseudogene 1	NA
0.587657	8.92402	5.53659	2.95973e-06	3.71789e-06	3.44581	RELL1	RELT like 1	ENSG00000181826
0.586778	7.97623	8.57661	3.37528e-10	9.1079e-10	12.573	PCNX1	pecanex 1	ENSG00000100731
0.58661	7.39437	9.69761	1.5148e-11	6.03553e-11	15.7145	RNF139	ring finger protein 139	ENSG00000170881
0.586439	6.92031	8.59172	3.23362e-10	8.81897e-10	12.6163	TSEN15	tRNA splicing endonuclease subunit 15	ENSG00000198860
0.586012	7.55333	8.58296	3.31502e-10	8.99289e-10	12.5912	SLC25A26	solute carrier family 25 member 26	ENSG00000144741
0.585932	8.92111	5.31363	5.86231e-06	7.00183e-06	2.76568	PHAX	phosphorylated adaptor for RNA export	ENSG00000164902
0.585781	7.16963	8.07791	1.41186e-09	3.21094e-09	11.1269	LMLN	leishmanolysin like peptidase	ENSG00000185621
0.585342	7.2237	6.6735	9.15697e-08	1.45485e-07	6.92389	PTEN	phosphatase and tensin homolog	ENSG00000171862
0.585034	8.39225	6.45904	1.75694e-07	2.70706e-07	6.2698	AGGF1	angiogenic factor with G-patch and FHA domains 1	ENSG00000164252
0.584724	8.04946	6.7112	8.16825e-08	1.31414e-07	7.03866	AGO3	argonaute RISC catalytic component 3	ENSG00000126070
0.583175	9.84859	6.62602	1.05754e-07	1.66979e-07	6.77927	VCAN	versican	ENSG00000038427
0.582965	9.26739	10.4508	2.06213e-12	1.1567e-11	17.7355	AGFG1	ArfGAP with FG repeats 1	ENSG00000173744
0.582627	7.55407	8.21173	9.58902e-10	2.25364e-09	11.5177	COQ10B	coenzyme Q10B	ENSG00000115520
0.58262	8.3638	8.40761	5.46351e-10	1.38626e-09	12.0861	UBE2G2	ubiquitin conjugating enzyme E2 G2	ENSG00000184787
0.582205	7.75703	8.73615	2.14907e-10	6.26302e-10	13.0295	URB2	URB2 ribosome biogenesis homolog	ENSG00000135763
0.582078	6.29678	9.75056	1.31346e-11	5.44605e-11	15.859	IKBKG	inhibitor of nuclear factor kappa B kinase regulatory subunit gamma	ENSG00000269335
0.58124	8.30616	7.45218	8.84919e-09	1.70305e-08	9.27515	PIP4K2A	phosphatidylinositol-5-phosphate 4-kinase type 2 alpha	ENSG00000150867
0.581051	5.80866	13.6816	8.96492e-16	2.28605e-14	25.5882	ERAP2	endoplasmic reticulum aminopeptidase 2	ENSG00000164308
0.580604	6.85514	6.71628	8.04356e-08	1.29817e-07	7.05411	DECR1	2,4-dienoyl-CoA reductase 1	ENSG00000104325
0.580567	9.16373	5.77331	1.43161e-06	1.92643e-06	4.17016	ARL2	ADP ribosylation factor like GTPase 2	ENSG00000213465
0.580293	7.62054	7.18539	1.95907e-08	3.58109e-08	8.4746	ARL13B	ADP ribosylation factor like GTPase 13B	ENSG00000169379
Genes suppressed by irradiation, upregulated in control transfected SK-N-DZ cells vs SK-N-AS cells								DZ vs AS w/o IR
logFC	AveExpr	t	P.Value	adj.P.Val	B	SYMBOL	GENENAME	ENSEMBL
-1.1224	9.91365	-2.87208	0.00681712	0.00684396	-4.10097	SNAI1	snail family transcriptional repressor 1	ENSG00000124216
-0.988409	12.1256	-6.75086	7.24408e-08	1.18035e-07	7.15929	SNORA48	small nucleolar RNA, H/ACA box 48	ENSG00000209582
-0.92923	6.63607	-3.30192	0.00218627	0.0022167	-3.02668	LINC01804	long intergenic non-protein coding RNA 1804	ENSG00000231031
-0.840247	7.03361	-5.07106	1.23068e-05	1.42002e-05	2.02948	LOC107985728	collagen alpha-1(III) chain-like	NA
-0.834685	8.59129	-4.38611	9.74618e-05	0.000104864	-0.0121488	SNORA2C	small nucleolar RNA, H/ACA box 2C	ENSG00000221491
-0.828405	9.13407	-6.76922	6.85252e-08	1.12373e-07	7.21512	RPL13P12	ribosomal protein L13 pseudogene 12	ENSG00000215030
-0.823435	6.6765	-6.51707	1.47254e-07	2.29662e-07	6.44697	LOC100420548	GTF2I repeat domain containing 1 pseudogene	NA
-0.813672	6.78938	-5.55148	2.82757e-06	3.58722e-06	3.49132	C8orf44-SGK3	C8orf44-SGK3 readthrough	ENSG00000288602
-0.797704	8.38005	-12.04	3.90316e-14	4.85515e-13	21.7594	STMN3	stathmin 3	ENSG00000197457
-0.793391	10.0865	-5.46006	3.74273e-06	4.62178e-06	3.21206	SNORD24	small nucleolar RNA, C/D box 24	ENSG00000206611
-0.789925	7.92303	-8.74131	2.11804e-10	6.20804e-10	13.0442	SMO	smoothened, frizzled class receptor	ENSG00000128602
-0.78776	8.97921	-6.67378	9.14918e-08	1.45485e-07	6.92475	CLU	clusterin	ENSG00000120885
-0.784479	5.75815	-4.37844	9.97151e-05	0.000107063	-0.034575	SNORD116-29	small nucleolar RNA, C/D box 116-29	ENSG00000207245
-0.78205	7.00421	-8.47209	4.54456e-10	1.17651e-09	12.2722	UBBP4	ubiquitin B pseudogene 4	ENSG00000263563
-0.768995	8.25585	-8.53667	3.78102e-10	1.00433e-09	12.4582	DRG2	developmentally regulated GTP binding protein 2	ENSG00000108591
-0.767849	6.43808	-9.21928	5.58454e-11	1.91149e-10	14.3932	RAB33A	RAB33A, member RAS oncogene family	ENSG00000134594
-0.767605	6.78671	-4.9936	1.55852e-05	1.79423e-05	1.79548	LOC105375426	uncharacterized LOC105375426	NA
-0.761455	9.15209	-4.65747	4.31881e-05	4.74697e-05	0.788356	RNVU1-17	RNA, variant U1 small nuclear 17	ENSG00000207349
-0.758873	10.1454	-3.26163	0.00243914	0.00246818	-3.13094	ID3	inhibitor of DNA binding 3, HLH protein	ENSG00000117318
-0.756484	9.28372	-9.34197	3.985e-11	1.43123e-10	14.7349	SAMM50	SAMM50 sorting and assembly machinery component	ENSG00000100347
-0.753304	7.88122	-4.36404	0.000104083	0.000111284	-0.0766298	RCC2-AS1	RCC2 antisense RNA 1	NA
-0.751304	8.95648	-11.122	3.71228e-13	2.91272e-12	19.4744	RNF5	ring finger protein 5	ENSG00000204308
-0.75107	7.39252	-6.70454	8.33471e-08	1.3367e-07	7.0184	SOD2-OT1	SOD2 overlapping transcript 1	ENSG00000285427
-0.748477	8.17816	-8.23728	8.90835e-10	2.10336e-09	11.5921	CHMP1A	charged multivesicular body protein 1A	ENSG00000131165
-0.748303	6.57132	-5.35513	5.16267e-06	6.26896e-06	2.89204	LOC105374206	uncharacterized LOC105374206	NA
-0.743986	7.38005	-7.98849	1.83046e-09	4.07657e-09	10.8647	ADM	adrenomedullin	ENSG00000148926
-0.743255	7.83007	-3.59278	0.000976964	0.00100454	-2.25478	SNORA35B	small nucleolar RNA, H/ACA box 35B	ENSG00000271907
-0.742166	8.03796	-5.54382	2.89481e-06	3.66119e-06	3.46791	CBSL	cystathionine beta-synthase like	ENSG00000274276
-0.741867	7.21567	-10.6053	1.38251e-12	8.59857e-12	18.1409	FZD4	frizzled class receptor 4	ENSG00000174804
-0.741773	7.94624	-6.11467	5.02834e-07	7.26475e-07	5.2161	CKMT1A	creatine kinase, mitochondrial 1A	ENSG00000223572
-0.741327	8.75577	-8.83874	1.6103e-10	4.80264e-10	13.3215	DNTTIP1	deoxynucleotidyltransferase terminal interacting protein 1	ENSG00000101457
-0.737141	6.88614	-12.6974	8.29069e-15	1.36395e-13	23.3313	SRRM4	serine/arginine repetitive matrix 4	ENSG00000139767
-0.734092	8.9454	-7.23725	1.67777e-08	3.15742e-08	8.63067	NT5C3B	5'-nucleotidase, cytosolic IIIB	ENSG00000141698
-0.730689	7.9239	-5.10195	1.11996e-05	1.29519e-05	2.12296	SNORD83B	small nucleolar RNA, C/D box 83B	ENSG00000209480
-0.73058	6.89084	-6.80424	6.16395e-08	1.02398e-07	7.32155	PAQR7	progestin and adipoQ receptor family member 7	ENSG00000182749
-0.730524	6.72804	-7.51614	7.32144e-09	1.43063e-08	9.46618	LOC400553	uncharacterized LOC400553	ENSG00000205037
-0.730092	6.86171	-10.6682	1.17597e-12	7.40424e-12	18.305	ISL2	ISL LIM homeobox 2	ENSG00000159556
-0.729423	6.01263	-10.4505	2.06391e-12	1.1567e-11	17.7346	ASNSP1	asparagine synthetase pseudogene 1	ENSG00000248498
-0.728533	11.0101	-5.40873	4.3806e-06	5.38339e-06	3.05544	SNORD97	small nucleolar RNA, C/D box 97	ENSG00000238622
-0.727497	7.9631	-7.32072	1.30798e-08	2.47981e-08	8.88144	ENDOG	endonuclease G	ENSG00000167136
-0.726767	8.59956	-5.62928	2.22716e-06	2.86831e-06	3.72924	PCGF1	polycomb group ring finger 1	ENSG00000115289
-0.725003	8.58272	-3.97004	0.000331952	0.000349063	-1.20977	RPL22P10	ribosomal protein L22 pseudogene 10	NA
-0.716859	6.77888	-3.08975	0.00386595	0.00390423	-3.56776	LOC101928041	ankyrin repeat domain-containing protein 20A2-like	NA
-0.716316	7.39038	-6.89742	4.65251e-08	7.90927e-08	7.60434	CKS1BP1	CDC28 protein kinase regulatory subunit 1B pseudogene 1	NA
-0.715102	7.13245	-9.43403	3.0974e-11	1.15305e-10	14.99	MED9	mediator complex subunit 9	ENSG00000141026
-0.714786	8.47253	-6.5029	1.53736e-07	2.38315e-07	6.40374	NAB2	NGFI-A binding protein 2	ENSG00000166886
-0.714219	8.45046	-10.341	2.74554e-12	1.45857e-11	17.4453	BASP1	brain abundant membrane attached signal protein 1	ENSG00000176788
-0.70618	8.90326	-6.89103	4.74308e-08	8.00984e-08	7.58495	H2AC17	H2A clustered histone 17	ENSG00000278677
-0.706138	6.77007	-6.50123	1.54522e-07	2.38807e-07	6.39862	EMSLR	E2F1 mRNA stabilizing lncRNA	NA
-0.704416	7.58519	-7.81114	3.07173e-09	6.44683e-09	10.3422	RPL15P16	ribosomal protein L15 pseudogene 16	ENSG00000234751
-0.703962	7.83363	-11.1865	3.15761e-13	2.59739e-12	19.6385	NCAPH2	non-SMC condensin II complex subunit H2	ENSG00000025770
-0.703086	8.16802	-8.15067	1.14374e-09	2.65139e-09	11.3396	LCMT1	leucine carboxyl methyltransferase 1	ENSG00000205629
-0.700639	8.50638	-6.51271	1.49218e-07	2.32015e-07	6.43367	CTDNEP1	CTD nuclear envelope phosphatase 1	ENSG00000175826
-0.698546	8.58832	-8.25424	8.4838e-10	2.02184e-09	11.6414	ANXA6	annexin A6	ENSG00000197043
-0.692947	8.31885	-10.9696	5.4509e-13	3.97137e-12	19.0847	NAA38	N-alpha-acetyltransferase 38, NatC auxiliary subunit	ENSG00000183011
-0.692507	6.43078	-12.8853	5.37516e-15	9.79047e-14	23.771	ZNF22-AS1	ZNF22 antisense RNA 1	ENSG00000165511
-0.690373	6.36989	-9.21944	5.58213e-11	1.91149e-10	14.3936	LOC105370420	uncharacterized LOC105370420	NA
-0.689867	7.53503	-12.2688	2.26293e-14	3.29741e-13	22.3125	OLFM2	olfactomedin 2	ENSG00000105088
-0.689237	5.43172	-5.90175	9.65466e-07	1.33847e-06	4.56365	NCOR1P4	NCOR1 pseudogene 4	NA
-0.688687	7.93276	-4.88383	2.17639e-05	2.45566e-05	1.46501	DUSP10	dual specificity phosphatase 10	ENSG00000143507
-0.683689	6.58237	-8.00764	1.73132e-09	3.87269e-09	10.9209	LOC107986411	uncharacterized LOC107986411	NA
-0.683252	6.50658	-13.3752	1.77085e-15	3.85631e-14	24.8976	REEP1	receptor accessory protein 1	ENSG00000068615
-0.682836	7.12803	-6.91808	4.3716e-08	7.48159e-08	7.66696	NFE2L3P2	nuclear factor, erythroid 2 like 3 pseudogene 2	NA
-0.68077	9.14672	-5.60613	2.39109e-06	3.06396e-06	3.65843	RPSAP53	ribosomal protein SA pseudogene 53	ENSG00000214263
-0.679307	7.50912	-5.19556	8.41379e-06	9.79688e-06	2.40673	PI4KAP2	phosphatidylinositol 4-kinase alpha pseudogene 2	ENSG00000183506
-0.676244	7.75747	-3.66471	0.000797449	0.000826624	-2.05906	RPS10P17	ribosomal protein S10 pseudogene 17	NA
-0.674811	12.0275	-6.37172	2.29255e-07	3.45918e-07	6.00294	RPL15P3	ribosomal protein L15 pseudogene 3	ENSG00000212802
-0.673618	7.12633	-7.62042	5.38031e-09	1.07186e-08	9.77678	AQP1	aquaporin 1 (Colton blood group)	ENSG00000240583
-0.673064	6.611	-7.23273	1.70053e-08	3.18103e-08	8.6171	CNN2P9	calponin 2 pseudogene 9	NA
-0.67118	7.43232	-10.1427	4.62092e-12	2.35667e-11	16.9176	ZMAT5	zinc finger matrin-type 5	ENSG00000100319
-0.670566	9.53047	-4.8601	2.33904e-05	2.62178e-05	1.39374	SNORA71D	small nucleolar RNA, H/ACA box 71D	ENSG00000200354
-0.669876	7.26061	-5.74533	1.55992e-06	2.08261e-06	4.08448	MIR6758	microRNA 6758	ENSG00000284152
-0.667217	9.70155	-5.77176	1.43844e-06	1.93053e-06	4.16541	ADRM1	adhesion regulating molecule 1	ENSG00000130706
-0.66684	6.82944	-8.66049	2.66112e-10	7.53985e-10	12.8134	EMILIN3	elastin microfibril interfacer 3	ENSG00000183798
-0.666714	9.03907	-8.24403	8.73686e-10	2.07246e-09	11.6117	MRPS18B	mitochondrial ribosomal protein S18B	ENSG00000204568
-0.663891	6.4356	-7.48409	8.05033e-09	1.56109e-08	9.37051	LINC01512	long intergenic non-protein coding RNA 1512	NA
-0.663797	7.27341	-12.0439	3.86651e-14	4.85515e-13	21.769	MAPK8IP2	mitogen-activated protein kinase 8 interacting protein 2	ENSG00000008735
-0.66129	7.40584	-9.13375	7.07394e-11	2.31263e-10	14.1539	LIMK2	LIM domain kinase 2	ENSG00000182541
-0.660154	10.2016	-5.22183	7.7642e-06	9.1449e-06	2.48651	PSMB5	proteasome 20S subunit beta 5	ENSG00000100804
-0.659968	6.24056	-5.49062	3.40786e-06	4.23904e-06	3.30539	RPL32P4	ribosomal protein L32 pseudogene 4	ENSG00000243761
-0.657076	7.04904	-7.0271	3.1489e-08	5.53773e-08	7.99695	PDCD4-AS1	PDCD4 antisense RNA 1	NA
-0.653805	7.16167	-8.87355	1.46049e-10	4.43364e-10	13.4203	LRRC75B	leucine rich repeat containing 75B	ENSG00000178026
-0.653522	5.88831	-4.6653	4.21788e-05	4.64604e-05	0.811667	RNY4P19	RNY4 pseudogene 19	ENSG00000199400
-0.652497	6.23351	-5.21694	7.8813e-06	9.26144e-06	2.47165	LOC107986561	uncharacterized LOC107986561	NA
-0.652089	7.31502	-11.4613	1.59463e-13	1.56396e-12	20.3315	CHRNA7	cholinergic receptor nicotinic alpha 7 subunit	ENSG00000175344
-0.651904	9.65917	-5.71099	1.73326e-06	2.26078e-06	3.97932	AARS1	alanyl-tRNA synthetase 1	ENSG00000090861
-0.651864	8.46852	-12.128	3.16245e-14	4.13551e-13	21.9729	AAR2	AAR2 splicing factor	ENSG00000131043
-0.651808	8.15293	-8.01724	1.68371e-09	3.78278e-09	10.9491	MPRIPP1	myosin phosphatase Rho interacting protein pseudogene 1	NA
-0.651699	7.321	-11.263	2.60822e-13	2.29343e-12	19.8324	HRH3	histamine receptor H3	ENSG00000101180
-0.649007	7.26097	-5.62472	2.25855e-06	2.90141e-06	3.71528	LOC150417	small nuclear ribonucleoprotein polypeptide A' pseudogene	NA
-0.647077	6.40389	-12.7295	7.69696e-15	1.3536e-13	23.4067	ADAMTSL1	ADAMTS like 1	ENSG00000178031
-0.647015	7.33694	-4.03466	0.000275004	0.000289776	-1.02654	H4C1	H4 clustered histone 1	ENSG00000278637
-0.646615	8.20545	-5.56219	2.73617e-06	3.47992e-06	3.52407	APOO	apolipoprotein O	ENSG00000184831
-0.645991	7.24652	-11.1888	3.13974e-13	2.59739e-12	19.6443	GPC2	glypican 2	ENSG00000213420
-0.645969	7.08839	-5.67762	1.92015e-06	2.48547e-06	3.87716	RPS12P4	ribosomal protein S12 pseudogene 4	NA
-0.645414	7.29318	-10.525	1.70115e-12	1.00641e-11	17.9306	CDK5R1	cyclin dependent kinase 5 regulatory subunit 1	ENSG00000176749
-0.644436	6.75988	-13.2498	2.3469e-15	4.76248e-14	24.6118	HSPA12A	heat shock protein family A (Hsp70) member 12A	ENSG00000165868
-0.643531	7.44401	-9.22708	5.46579e-11	1.90928e-10	14.415	INPP5K	inositol polyphosphate-5-phosphatase K	ENSG00000132376
-0.642965	7.70159	-4.16696	0.000186584	0.000197833	-0.64807	LOC107987172	uncharacterized LOC107987172	NA
-0.64198	7.10461	-5.70269	1.77799e-06	2.3132e-06	3.9539	RFX5-AS1	RFX5 antisense RNA 1	NA
-0.64165	7.32184	-6.33499	2.56442e-07	3.83535e-07	5.89059	EIF4A1P11	eukaryotic translation initiation factor 4A1 pseudogene 11	NA
-0.64156	6.43436	-9.9308	8.10578e-12	3.69103e-11	16.3481	NKAIN2	sodium/potassium transporting ATPase interacting 2	ENSG00000188580
-0.641426	7.21459	-3.50291	0.00125648	0.00128161	-2.49672	HSPE1P2	heat shock protein family E (Hsp10) member 1 pseudogene 2	NA
-0.640967	6.64479	-8.71302	2.29402e-10	6.60987e-10	12.9635	FAM163B	family with sequence similarity 163 member B	ENSG00000196990
-0.640331	6.65775	-5.73846	1.59319e-06	2.12147e-06	4.06342	LOC391247	GINS complex subunit 2 (Psf2 homolog) pseudogene	NA
-0.638736	7.77638	-8.45219	4.81008e-10	1.23896e-09	12.2148	UBE2L3	ubiquitin conjugating enzyme E2 L3	ENSG00000185651
-0.637899	8.32259	-12.6688	8.85881e-15	1.41187e-13	23.2641	NARF	nuclear prelamin A recognition factor	ENSG00000141562
-0.637793	10.474	-8.81369	1.72764e-10	5.12266e-10	13.2503	MCM7	minichromosome maintenance complex component 7	ENSG00000166508
-0.636056	8.72708	-3.65968	0.000808888	0.000836781	-2.07281	RPSAP3	ribosomal protein SA pseudogene 3	ENSG00000242952
-0.635795	9.01952	-9.84784	1.01169e-11	4.44794e-11	16.1235	IST1	IST1 factor associated with ESCRT-III	ENSG00000182149
-0.635354	8.04108	-10.861	7.18122e-13	4.81898e-12	18.8051	MVD	mevalonate diphosphate decarboxylase	ENSG00000167508
-0.635329	9.14776	-6.78761	6.48188e-08	1.06637e-07	7.271	PIGU	phosphatidylinositol glycan anchor biosynthesis class U	ENSG00000101464
-0.635152	7.68818	-5.39372	4.58675e-06	5.6097e-06	3.00968	RPSAP15	ribosomal protein SA pseudogene 15	ENSG00000237506
-0.634447	7.0863	-14.3082	2.30192e-16	7.33738e-15	26.9673	CNGB1	cyclic nucleotide gated channel subunit beta 1	ENSG00000070729
-0.634116	6.22653	-12.0277	4.01996e-14	4.88138e-13	21.7295	TMC5	transmembrane channel like 5	ENSG00000103534
-0.633924	7.28404	-5.58126	2.58066e-06	3.29858e-06	3.58238	RPSAP29	ribosomal protein SA pseudogene 29	ENSG00000244722
-0.633505	6.81041	-5.31915	5.76421e-06	6.91705e-06	2.78245	RPL23AP51	ribosomal protein L23a pseudogene 51	ENSG00000234718
-0.633451	10.5375	-7.29976	1.39229e-08	2.62988e-08	8.81852	GOT2	glutamic-oxaloacetic transaminase 2	ENSG00000125166
-0.63331	7.54849	-5.51168	3.19474e-06	3.99343e-06	3.3697	RPL7AP6	ribosomal protein L7a pseudogene 6	ENSG00000242071
-0.633284	6.2852	-16.8695	1.34384e-18	2.28453e-16	32.1804	AR	androgen receptor	ENSG00000169083
-0.633195	8.06573	-8.95197	1.17281e-10	3.62504e-10	13.6422	POLR3H	RNA polymerase III subunit H	ENSG00000100413
-0.632627	8.33216	-4.40732	9.14872e-05	9.87723e-05	0.0499392	RPS10P16	ribosomal protein S10 pseudogene 16	NA
-0.632293	8.14541	-6.05614	6.01528e-07	8.52165e-07	5.03676	RALGDS	ral guanine nucleotide dissociation stimulator	ENSG00000160271
-0.630756	9.04898	-6.9739	3.6951e-08	6.40986e-08	7.83605	RANBP9	RAN binding protein 9	ENSG00000010017
-0.630292	7.47228	-9.03854	9.21363e-11	2.93685e-10	13.8864	NACAD	NAC alpha domain containing	ENSG00000136274
-0.628782	7.66076	-9.87423	9.42729e-12	4.21747e-11	16.195	FBXL16	F-box and leucine rich repeat protein 16	ENSG00000127585
-0.628598	6.83674	-5.81181	1.27212e-06	1.72549e-06	4.28809	LOC112268113	60S ribosomal protein L23a pseudogene	NA
-0.628183	6.16153	-9.50977	2.51959e-11	9.58947e-11	15.1991	LOC100128966	uncharacterized LOC100128966	ENSG00000120709
-0.626929	6.71972	-5.19717	8.37247e-06	9.79348e-06	2.41162	RPL23AP61	ribosomal protein L23a pseudogene 61	ENSG00000280012
-0.626627	11.1331	-3.71201	0.000697246	0.000725705	-1.9294	SNORA23	small nucleolar RNA, H/ACA box 23	ENSG00000201998
-0.625958	8.93954	-10.1383	4.67437e-12	2.36033e-11	16.9059	TOMM34	translocase of outer mitochondrial membrane 34	ENSG00000025772
-0.625724	6.633	-7.86166	2.64967e-09	5.63055e-09	10.4914	RPS12P29	ribosomal protein S12 pseudogene 29	ENSG00000213939
-0.625473	8.05222	-7.92842	2.18046e-09	4.712e-09	10.6881	EMC8	ER membrane protein complex subunit 8	ENSG00000131148
-0.623813	8.18569	-5.73329	1.61866e-06	2.13864e-06	4.04758	PRDX2P4	peroxiredoxin 2 pseudogene 4	NA
-0.623025	7.67579	-9.72237	1.41701e-11	5.78142e-11	15.7821	TRAF4	TNF receptor associated factor 4	ENSG00000076604
-0.622266	8.09897	-7.11702	2.40411e-08	4.3325e-08	8.26853	MRPL22	mitochondrial ribosomal protein L22	ENSG00000082515
-0.622157	8.21496	-6.69105	8.6826e-08	1.38813e-07	6.97732	MGAT5	alpha-1,6-mannosylglycoprotein 6-beta-N-acetylglucosaminyltransferase	ENSG00000152127
-0.621962	8.53728	-9.37434	3.64668e-11	1.32843e-10	14.8247	ATF4	activating transcription factor 4	ENSG00000128272
-0.621817	7.54902	-11.4076	1.82109e-13	1.75237e-12	20.1968	ARID3A	AT-rich interaction domain 3A	ENSG00000116017
-0.62159	7.70232	-5.31576	5.82425e-06	6.97269e-06	2.77215	LINC01201	long intergenic non-protein coding RNA 1201	ENSG00000228659
-0.621028	7.08803	-7.216	1.78773e-08	3.32752e-08	8.56675	LOC441644	REST corepressor 2 pseudogene	NA
-0.619678	8.99049	-3.60907	0.000933175	0.000961453	-2.21061	RPL22P19	ribosomal protein L22 pseudogene 19	ENSG00000241129
-0.619613	7.04755	-9.95506	7.59826e-12	3.52283e-11	16.4136	MYL9	myosin light chain 9	ENSG00000101335
-0.619215	6.73702	-5.78565	1.37843e-06	1.85979e-06	4.20795	USP10P2	ubiquitin specific peptidase10 pseudogene 2	NA
-0.617275	6.81815	-10.901	6.48721e-13	4.47092e-12	18.9082	FAM131B	family with sequence similarity 131 member B	ENSG00000159784
-0.616924	6.94264	-13.405	1.65673e-15	3.84061e-14	24.9652	DTX4	deltex E3 ubiquitin ligase 4	ENSG00000110042
-0.616743	6.63791	-7.12687	2.33417e-08	4.2364e-08	8.29824	TRIM52-AS1	TRIM52 antisense RNA 1 (head to head)	ENSG00000248275
-0.616737	6.84725	-12.0028	4.26707e-14	5.06094e-13	21.669	LOXL3	lysyl oxidase like 3	ENSG00000115318
-0.616156	7.24439	-13.1682	2.82136e-15	5.32924e-14	24.425	CYB5D2	cytochrome b5 domain containing 2	ENSG00000167740
-0.616101	7.55433	-4.37444	0.000100911	0.000108118	-0.046267	LINC00863	long intergenic non-protein coding RNA 863	ENSG00000224914
-0.615676	7.77326	-8.31424	7.13961e-10	1.7339e-09	11.8157	RBM38	RNA binding motif protein 38	ENSG00000132819
-0.615608	7.30864	-11.6123	1.10011e-13	1.16886e-12	20.7081	STARD10	StAR related lipid transfer domain containing 10	ENSG00000214530
-0.615607	7.90342	-7.78075	3.35783e-09	6.98978e-09	10.2523	PODXL2	podocalyxin like 2	ENSG00000114631
-0.615544	8.96988	-6.38542	2.19881e-07	3.33748e-07	6.0448	WDR74	WD repeat domain 74	ENSG00000133316
-0.615045	7.44818	-3.76977	0.000591338	0.000616733	-1.77007	RPL3P4	ribosomal protein L3 pseudogene 4	ENSG00000232573
-0.614833	7.55351	-9.92154	8.30836e-12	3.74979e-11	16.323	CNIH2	cornichon family AMPA receptor auxiliary protein 2	ENSG00000174871
-0.614754	8.40697	-3.6828	0.00075758	0.000786896	-2.00956	LOC100134868	uncharacterized LOC100134868	NA
-0.614558	9.1375	-6.22152	3.62658e-07	5.36103e-07	5.54333	MCM2	minichromosome maintenance complex component 2	ENSG00000073111
-0.613625	7.01108	-6.36409	2.34654e-07	3.5302e-07	5.9796	EID2	EP300 interacting inhibitor of differentiation 2	ENSG00000176396
-0.612122	8.68413	-6.90459	4.55301e-08	7.76601e-08	7.62608	PXMP2	peroxisomal membrane protein 2	ENSG00000176894
-0.611874	10.6892	-2.8083	0.00802025	0.008036	-4.25263	ID1	inhibitor of DNA binding 1, HLH protein	ENSG00000125968
-0.611794	8.18108	-5.73631	1.60369e-06	2.12438e-06	4.05685	HDDC2	HD domain containing 2	ENSG00000111906
-0.611009	9.17082	-5.41484	4.29924e-06	5.29616e-06	3.07409	POLDIP2	DNA polymerase delta interacting protein 2	ENSG00000004142
-0.610957	7.06961	-9.01908	9.72649e-11	3.04326e-10	13.8316	RTN4RL2	reticulon 4 receptor like 2	ENSG00000186907
-0.610872	6.07877	-5.97539	7.70363e-07	1.07936e-06	4.78932	LOC105369435	uncharacterized LOC105369435	NA
-0.61077	7.19891	-5.85124	1.12721e-06	1.533e-06	4.40889	GLIDR	glioblastoma down-regulated RNA	ENSG00000278175
-0.610697	7.06568	-12.1919	2.71573e-14	3.64598e-13	22.1274	MAST1	microtubule associated serine/threonine kinase 1	ENSG00000105613
-0.608432	8.66363	-6.42073	1.97444e-07	3.02391e-07	6.15273	AHCY	adenosylhomocysteinase	ENSG00000101444
-0.607846	8.01527	-6.18924	4.00276e-07	5.86611e-07	5.44448	EEF1GP5	eukaryotic translation elongation factor 1 gamma pseudogene 5	ENSG00000234785
-0.607642	7.77705	-8.38119	5.89263e-10	1.46597e-09	12.0097	RPL13	ribosomal protein L13	ENSG00000167526
-0.607635	7.74827	-5.72756	1.64733e-06	2.15974e-06	4.03006	PRCP	prolylcarboxypeptidase	ENSG00000137509
-0.607439	6.6032	-6.29475	2.89952e-07	4.32385e-07	5.7675	LOC730129	neugrin, neurite outgrowth associated pseudogene	NA
-0.607101	6.63252	-14.499	1.53442e-16	5.58968e-15	27.3787	KCNAB3	potassium voltage-gated channel subfamily A regulatory beta subunit 3	ENSG00000170049
-0.606628	6.4269	-8.77544	1.9239e-10	5.67161e-10	13.1415	DUSP5P1	dual specificity phosphatase 5 pseudogene 1	NA
-0.60653	6.92362	-13.7625	7.50398e-16	2.01423e-14	25.7687	PLPP4	phospholipid phosphatase 4	ENSG00000203805
-0.606268	6.16731	-8.20299	9.83367e-10	2.30054e-09	11.4922	PARM1	prostate androgen-regulated mucin-like protein 1	ENSG00000169116
-0.605928	6.47625	-15.8877	8.9579e-18	9.01225e-16	30.2587	MYO10	myosin X	ENSG00000145555
-0.605356	6.79668	-9.42978	3.13363e-11	1.15808e-10	14.9782	TMEM88	transmembrane protein 88	ENSG00000167874
-0.60431	6.76044	-7.87115	2.57715e-09	5.49937e-09	10.5194	ZNF703	zinc finger protein 703	ENSG00000183779
-0.604272	8.22693	-5.37807	4.81222e-06	5.87137e-06	2.96195	RPSAP55	ribosomal protein SA pseudogene 55	ENSG00000214896
-0.603704	7.04425	-8.6225	2.9633e-10	8.25344e-10	12.7046	ZNF425	zinc finger protein 425	ENSG00000204947
-0.60312	7.31675	-9.18188	6.19208e-11	2.10531e-10	14.2887	ALOX12-AS1	ALOX12 antisense RNA 1	ENSG00000215067
-0.603021	10.1318	-5.3671	4.97664e-06	6.05748e-06	2.92853	MYBL2	MYB proto-oncogene like 2	ENSG00000101057
-0.602368	9.07779	-4.84739	2.43101e-05	2.71889e-05	1.35562	EEF1A2	eukaryotic translation elongation factor 1 alpha 2	ENSG00000101210
-0.60236	7.49183	-9.51421	2.48939e-11	9.54579e-11	15.2113	FABP6	fatty acid binding protein 6	ENSG00000170231
-0.602357	8.92301	-5.72062	1.68282e-06	2.20061e-06	4.00879	LOC100420528	CTD nuclear envelope phosphatase 1 pseudogene	NA
-0.602244	6.7709	-6.07427	5.69043e-07	8.10647e-07	5.09231	ZNF710-AS1	ZNF710 antisense RNA 1	ENSG00000259291
-0.600948	6.96854	-11.3788	1.95577e-13	1.81353e-12	20.1244	TCN2	transcobalamin 2	ENSG00000185339
-0.600718	6.26487	-15.4705	2.06142e-17	1.16814e-15	29.414	ZYG11A	zyg-11 family member A, cell cycle regulator	ENSG00000203995
-0.599934	6.9291	-13.3643	1.81473e-15	3.85631e-14	24.8727	LARGE1	LARGE xylosyl- and glucuronyltransferase 1	ENSG00000133424
-0.599632	7.05813	-9.8081	1.12539e-11	4.82308e-11	16.0156	PAXIP1-DT	PAXIP1 divergent transcript	ENSG00000273344
-0.599137	7.92743	-8.51787	3.98875e-10	1.05402e-09	12.4041	CCDC134	coiled-coil domain containing 134	ENSG00000100147
-0.598646	6.59302	-6.2041	3.82496e-07	5.63794e-07	5.48999	LOC105372316	uncharacterized LOC105372316	ENSG00000269043
-0.598053	7.47667	-5.85535	1.11307e-06	1.51782e-06	4.4215	ZNF823	zinc finger protein 823	ENSG00000197933
-0.59786	7.77698	-10.5608	1.55092e-12	9.31035e-12	18.0244	CENPM	centromere protein M	ENSG00000100162
-0.597563	7.59608	-7.56548	6.32749e-09	1.24595e-08	9.61327	SENP3	SUMO specific peptidase 3	ENSG00000161956
-0.597473	7.42178	-4.62475	4.76641e-05	5.21646e-05	0.691176	RPL32P13	ribosomal protein L32 pseudogene 13	ENSG00000241002
-0.597267	9.29112	-7.95363	2.02598e-09	4.45367e-09	10.7623	DCTPP1	dCTP pyrophosphatase 1	ENSG00000179958
-0.59702	6.77785	-9.04286	9.10372e-11	2.92006e-10	13.8986	GFRA1	GDNF family receptor alpha 1	ENSG00000151892
-0.596884	6.8472	-9.17449	6.31993e-11	2.10664e-10	14.268	EFS	embryonal Fyn-associated substrate	ENSG00000100842
-0.59598	7.40256	-4.12409	0.000211649	0.00022348	-0.771171	TRAV8-5	T cell receptor alpha variable 8-5 (pseudogene)	NA
-0.595581	6.23855	-5.39818	4.52459e-06	5.54697e-06	3.02326	RAB27B	RAB27B, member RAS oncogene family	ENSG00000041353
-0.595561	8.13764	-3.5491	0.00110438	0.001131	-2.37274	SNORA50A	small nucleolar RNA, H/ACA box 50A	ENSG00000281910
-0.59534	8.96591	-3.54109	0.00112941	0.00115431	-2.39428	RNU1-83P	RNA, U1 small nuclear 83, pseudogene	ENSG00000200296
-0.595294	7.65366	-4.7084	3.70328e-05	4.10581e-05	0.939979	RPSAP49	ribosomal protein SA pseudogene 49	ENSG00000226327
-0.594404	7.47081	-10.4081	2.30463e-12	1.27757e-11	17.6228	IQSEC1	IQ motif and Sec7 domain ArfGEF 1	ENSG00000144711
-0.594374	5.98567	-7.68715	4.42027e-09	8.94578e-09	9.97501	BRWD1-AS1	BRWD1 antisense RNA 1	ENSG00000238141
-0.593365	10.2281	-4.20517	0.000166706	0.000177495	-0.53796	HSPE1P8	heat shock protein family E (Hsp10) member 1 pseudogene 8	NA
-0.593332	6.20987	-17.9873	1.71726e-19	8.758e-17	34.2626	ZNF385D	zinc finger protein 385D	ENSG00000151789
-0.593051	8.5353	-4.82009	2.6409e-05	2.94075e-05	1.27378	RNVU1-6	RNA, variant U1 small nuclear 6	ENSG00000201558
-0.593026	10.6217	-5.12985	1.02849e-05	1.19212e-05	2.20746	CPNE1	copine 1	ENSG00000214078
-0.592765	7.13766	-10.3933	2.3951e-12	1.31344e-11	17.5838	CRELD1	cysteine rich with EGF like domains 1	ENSG00000163703
-0.592723	6.28916	-5.8032	1.30618e-06	1.76698e-06	4.26171	EIF3LP3	eukaryotic translation initiation factor 3 subunit L pseudogene 3	ENSG00000226086
-0.592456	8.96471	-3.86348	0.000451865	0.00047418	-1.50939	CCZ1	CCZ1 homolog, vacuolar protein trafficking and biogenesis associated	ENSG00000122674
-0.592146	7.94063	-6.64197	1.00756e-07	1.59583e-07	6.82788	LOC343508	aconitase 2, mitochondrial pseudogene	NA
-0.59124	7.02404	-6.72524	7.82813e-08	1.26741e-07	7.08139	IGBP1P2	immunoglobulin (CD79A) binding protein 1 pseudogene 2	NA
-0.590314	6.93245	-8.38261	5.86873e-10	1.46597e-09	12.0138	LHFPL6	LHFPL tetraspan subfamily member 6	ENSG00000183722
-0.590228	8.72594	-7.69044	4.37767e-09	8.89487e-09	9.98478	REPS1	RALBP1 associated Eps domain containing 1	ENSG00000135597
-0.589392	9.11296	-3.57265	0.00103381	0.00106086	-2.30922	SNORD27	small nucleolar RNA, C/D box 27	ENSG00000275996
-0.589164	9.06747	-6.92624	4.26545e-08	7.32452e-08	7.69168	LOC728533	IST1 homolog	NA
-0.589104	6.20119	-4.83989	2.48697e-05	2.77539e-05	1.33312	RPL23AP96	ribosomal protein L23a pseudogene 96	NA
-0.588374	8.89283	-4.67922	4.04443e-05	4.46463e-05	0.853069	RPSAP12	ribosomal protein SA pseudogene 12	ENSG00000240087
-0.588114	9.61907	-6.09748	5.30008e-07	7.6142e-07	5.16343	NELFCD	negative elongation factor complex member C/D	ENSG00000101158
-0.587604	8.39931	-5.86381	1.08459e-06	1.49498e-06	4.44739	SLC6A6	solute carrier family 6 member 6	ENSG00000131389
-0.587383	8.80347	-8.30408	7.3511e-10	1.77681e-09	11.7862	UBE2I	ubiquitin conjugating enzyme E2 I	ENSG00000103275
-0.587325	6.81619	-5.26934	6.71377e-06	7.96284e-06	2.6309	SCARNA21B	small Cajal body-specific RNA 21B	ENSG00000251866
-0.587296	6.37022	-4.51056	6.71786e-05	7.32075e-05	0.353383	MIR15A	microRNA 15a	ENSG00000283785
-0.586918	7.2957	-14.344	2.13257e-16	7.25073e-15	27.0448	DEF8	differentially expressed in FDCP 8 homolog	ENSG00000140995
-0.586213	6.71666	-9.94958	7.70997e-12	3.54242e-11	16.3988	KIZ	kizuna centrosomal protein	ENSG00000088970
-0.586052	7.15107	-11.0434	4.52437e-13	3.39328e-12	19.2737	MRAS	muscle RAS oncogene homolog	ENSG00000158186
-0.585662	6.80672	-5.48464	3.47095e-06	4.30702e-06	3.28712	LOC105375521	uncharacterized LOC105375521	NA
-0.585418	6.05552	-3.38193	0.00175637	0.00178436	-2.81764	TCP11X2	t-complex 11 family, X-linked 2	ENSG00000215029
-0.5848	10.2815	-9.85244	9.99328e-12	4.4318e-11	16.1359	BUB3	BUB3 mitotic checkpoint protein	ENSG00000154473
-0.584572	6.34526	-15.8309	1.00249e-17	9.01225e-16	30.1447	MROH8	maestro heat like repeat family member 8	ENSG00000101353
-0.584544	6.706	-14.6362	1.14884e-16	4.507e-15	27.6722	ACSF3	acyl-CoA synthetase family member 3	ENSG00000176715
-0.584373	8.59587	-4.46118	7.78863e-05	8.45149e-05	0.208007	NDUFAF2	NADH:ubiquinone oxidoreductase complex assembly factor 2	ENSG00000164182
-0.583929	7.10583	-5.19626	8.39596e-06	9.79688e-06	2.40884	SNORD13P1	small nucleolar RNA, C/D box 13 pseudogene 1	ENSG00000238498
-0.583551	5.67048	-5.32039	5.74225e-06	6.90695e-06	2.78625	GRM3-AS1	GRM3 antisense RNA 1	NA
-0.583203	7.58835	-8.93729	1.22189e-10	3.754e-10	13.6007	TOM1	target of myb1 membrane trafficking protein	ENSG00000100284
-0.582629	7.16791	-5.54141	2.91627e-06	3.67234e-06	3.46055	C11orf96	chromosome 11 open reading frame 96	ENSG00000187479
-0.582362	6.04348	-6.39281	2.14977e-07	3.27279e-07	6.06741	LOC101928701	uncharacterized LOC101928701	ENSG00000287925
-0.58136	8.30994	-6.87773	4.93728e-08	8.31028e-08	7.54461	NDST1	N-deacetylase and N-sulfotransferase 1	ENSG00000070614
-0.581083	6.88733	-6.09893	5.27663e-07	7.60193e-07	5.16786	LOC105374775	uncharacterized LOC105374775	NA
-0.580999	7.04045	-10.0924	5.27725e-12	2.56324e-11	16.783	DHRS7B	dehydrogenase/reductase 7B	ENSG00000109016
-0.580741	7.20101	-9.42137	3.20646e-11	1.17647e-10	14.955	PNMA8A	PNMA family member 8A	ENSG00000182013
-0.580346	7.89183	-8.35384	6.37297e-10	1.5626e-09	11.9305	KIFC1	kinesin family member C1	ENSG00000237649
Genes induced by irradiation, upregulated in control transfected SK-N-AS cells vs SK-N-DZ cells								AS vs DZ IR
logFC	AveExpr	t	P.Value	adj.P.Val	B	SYMBOL	GENENAME	ENSEMBL
1.10335	9.32216	7.21062	1.81667e-08	3.66924e-08	8.56618	SNORD32A	small nucleolar RNA, C/D box 32A	ENSG00000201675
1.02943	7.32426	7.88212	2.49589e-09	6.6083e-09	10.5671	LOC105378678	uncharacterized LOC105378678	NA
0.984155	9.01703	10.3489	2.68886e-12	2.49819e-11	17.4808	NFKBIA	NFKB inhibitor alpha	ENSG00000100906
0.978724	8.84794	3.10376	0.00372499	0.00373963	-3.51607	TIPARP	TCDD inducible poly(ADP-ribose) polymerase	ENSG00000163659
0.942397	7.01662	10.0664	5.6537e-12	4.72346e-11	16.7276	AGAP2-AS1	AGAP2 antisense RNA 1	ENSG00000255737
0.929478	8.75387	6.56459	1.27443e-07	2.13442e-07	6.60779	SNORD34	small nucleolar RNA, C/D box 34	ENSG00000202503
0.859474	6.49989	8.75286	2.05019e-10	8.24918e-10	13.0922	MIR503	microRNA 503	ENSG00000208005
0.83946	9.28948	8.12142	1.24471e-09	3.61389e-09	11.2694	CD151	CD151 molecule (Raph blood group)	ENSG00000177697
0.834281	7.3456	6.00254	7.08869e-07	1.01466e-06	4.88848	BCL2L2-PABPN1	BCL2L2-PABPN1 readthrough	ENSG00000258643
0.811663	7.88858	5.61821	2.30412e-06	3.04239e-06	3.71144	FTLP2	ferritin light chain pseudogene 2	NA
0.788441	7.11242	4.79523	2.84763e-05	3.23951e-05	1.2156	FAM230H	family with sequence similarity 230 member H	ENSG00000206142
0.776933	10.4167	8.78303	1.88321e-10	7.69855e-10	13.1781	EIF3I	eukaryotic translation initiation factor 3 subunit I	ENSG00000084623
0.768702	10.6956	7.0601	2.85174e-08	5.39717e-08	8.11235	RPS5	ribosomal protein S5	ENSG00000083845
0.764415	6.41888	9.08482	8.10173e-11	3.72972e-10	14.0315	RAB32	RAB32, member RAS oncogene family	ENSG00000118508
0.752483	9.81984	6.05788	5.9833e-07	8.78134e-07	5.05805	EIF3G	eukaryotic translation initiation factor 3 subunit G	ENSG00000130811
0.744668	6.43915	6.21955	3.6484e-07	5.61546e-07	5.55323	ASS1P4	argininosuccinate synthetase 1 pseudogene 4	ENSG00000213487
0.738593	10.2082	6.31365	2.73702e-07	4.33008e-07	5.84119	UBE2MP1	ubiquitin conjugating enzyme E2 M pseudogene 1	NA
0.736516	9.19973	4.99824	1.53664e-05	1.80928e-05	1.82571	UBL5P2	ubiquitin like 5 pseudogene 2	NA
0.736417	6.32472	4.30344	0.00012463	0.000131854	-0.236861	NPY4R2	neuropeptide Y receptor Y4-2	ENSG00000264717
0.735815	9.02093	5.77558	1.42169e-06	1.93214e-06	4.19313	CDK5	cyclin dependent kinase 5	ENSG00000164885
0.731577	9.58116	4.08261	0.000239028	0.000246257	-0.873453	FLNA	filamin A	ENSG00000196924
0.729633	6.94264	8.97678	1.09434e-10	4.82077e-10	13.7272	LOC401021	uncharacterized LOC401021	NA
0.729032	5.25673	4.8915	2.12627e-05	2.46377e-05	1.5043	LOC105375672	uncharacterized LOC105375672	NA
0.727111	8.78195	6.13668	4.70079e-07	7.0443e-07	5.29947	ATP5MPL	ATP synthase membrane subunit 6.8PL	ENSG00000156411
0.725299	9.82213	8.10059	1.32205e-09	3.81677e-09	11.2086	DDX56	DEAD-box helicase 56	ENSG00000136271
0.722814	6.48379	5.04517	1.33185e-05	1.58074e-05	1.9674	MYO5BP2	myosin VB pseudogene 2	ENSG00000238245
0.716345	8.23101	4.52586	6.41658e-05	6.94677e-05	0.414843	TGFB1	transforming growth factor beta 1	ENSG00000105329
0.713907	8.20985	9.65832	1.68426e-11	1.03694e-10	15.6217	AP1S1	adaptor related protein complex 1 subunit sigma 1	ENSG00000106367
0.711413	6.8319	5.02889	1.39961e-05	1.65555e-05	1.91823	SNORD77	small nucleolar RNA, C/D box 77	NA
0.710553	8.67057	9.22908	5.43564e-11	2.67078e-10	14.4354	MYL12A	myosin light chain 12A	ENSG00000101608
0.701428	7.7345	6.8402	5.52948e-08	9.91426e-08	7.44645	VDAC1P3	voltage dependent anion channel 1 pseudogene 3	NA
0.701099	9.92606	6.79856	6.27073e-08	1.11262e-07	7.32002	PSENEN	presenilin enhancer, gamma-secretase subunit	ENSG00000205155
0.701073	9.815	4.79463	2.8528e-05	3.23951e-05	1.21381	ATP5ME	ATP synthase membrane subunit e	ENSG00000169020
0.696413	6.94713	7.44694	8.98765e-09	1.98818e-08	9.27502	C9orf116	chromosome 9 open reading frame 116	ENSG00000160345
0.695431	9.47969	5.53634	2.96196e-06	3.80292e-06	3.46116	SNORD104	small nucleolar RNA, C/D box 104	ENSG00000199753
0.693319	8.36277	5.14197	9.91127e-06	1.20301e-05	2.26037	SNORA65	small nucleolar RNA, H/ACA box 65	ENSG00000201302
0.692486	9.54949	5.19296	8.4809e-06	1.04176e-05	2.41503	PEPD	peptidase D	ENSG00000124299
0.691585	6.43708	7.99432	1.7997e-09	4.99808e-09	10.8972	CRYZL2P	crystallin zeta like 2, pseudogene	ENSG00000242193
0.690924	9.29226	8.91633	1.29563e-10	5.51724e-10	13.5564	SCAMP3	secretory carrier membrane protein 3	ENSG00000116521
0.688134	9.32204	8.9269	1.25789e-10	5.40151e-10	13.5863	BABAM1	BRISC and BRCA1 A complex member 1	ENSG00000105393
0.687534	9.12378	5.97779	7.64712e-07	1.07947e-06	4.81266	UBL5	ubiquitin like 5	ENSG00000198258
0.687079	8.3643	5.48539	3.463e-06	4.42399e-06	3.30551	MRPL40	mitochondrial ribosomal protein L40	ENSG00000185608
0.685756	9.3232	10.9575	5.62066e-13	7.76259e-12	19.0677	BCAP31	B cell receptor associated protein 31	ENSG00000185825
0.685128	9.16533	5.89322	9.91024e-07	1.37612e-06	4.55354	STUB1	STIP1 homology and U-box containing protein 1	ENSG00000103266
0.679962	7.21292	9.44243	3.02723e-11	1.66335e-10	15.028	SH3BP5L	SH3 binding domain protein 5 like	ENSG00000175137
0.679325	8.11222	7.48385	8.05626e-09	1.81355e-08	9.38528	CDKN2C	cyclin dependent kinase inhibitor 2C	ENSG00000123080
0.677879	10.6729	9.38513	3.54052e-11	1.90755e-10	14.8694	AP2M1	adaptor related protein complex 2 subunit mu 1	ENSG00000161203
0.675327	10.6759	6.13288	4.75585e-07	7.08524e-07	5.28781	LOC100287430	ribosomal protein S5 pseudogene	ENSG00000233558
0.674922	8.59563	7.89657	2.39278e-09	6.40162e-09	10.6097	MRPL17	mitochondrial ribosomal protein L17	ENSG00000158042
0.674237	8.05453	9.59799	1.98289e-11	1.16688e-10	15.4564	NT5C	5', 3'-nucleotidase, cytosolic	ENSG00000125458
0.672933	9.0956	6.76926	6.85176e-08	1.2115e-07	7.23098	TBRG4	transforming growth factor beta regulator 4	ENSG00000136270
0.670934	8.48398	6.57934	1.21856e-07	2.04831e-07	6.65278	HK1	hexokinase 1	ENSG00000156515
0.670515	7.81726	6.71721	8.02092e-08	1.40366e-07	7.07271	LSM10	LSM10, U7 small nuclear RNA associated	ENSG00000181817
0.668705	7.6931	6.95579	3.90222e-08	7.12154e-08	7.79688	PLEC	plectin	ENSG00000178209
0.668406	8.54969	5.56588	2.70537e-06	3.50873e-06	3.55144	ASB6	ankyrin repeat and SOCS box containing 6	ENSG00000148331
0.668037	8.89011	5.36295	5.04037e-06	6.29738e-06	2.93202	SNORA70I	small nucleolar RNA, H/ACA box 70I	ENSG00000207274
0.665777	6.33856	11.5399	1.31396e-13	2.48679e-12	20.5416	APOBEC3F	apolipoprotein B mRNA editing enzyme catalytic subunit 3F	ENSG00000128394
0.665343	8.0615	8.12949	1.21599e-09	3.55068e-09	11.293	C19orf48	chromosome 19 open reading frame 48	ENSG00000167747
0.661902	8.45869	7.2949	1.41261e-08	2.91065e-08	8.8195	SLC4A2	solute carrier family 4 member 2	ENSG00000164889
0.661431	7.87395	4.11532	0.000217173	0.000225102	-0.779906	MSC	musculin	ENSG00000178860
0.661064	5.96771	5.04482	1.33327e-05	1.58074e-05	1.96634	MIR205	microRNA 205	ENSG00000284485
0.660585	7.99624	6.62387	1.06445e-07	1.81917e-07	6.78852	PPP6R1	protein phosphatase 6 regulatory subunit 1	ENSG00000105063
0.66032	6.35912	4.02975	0.000278974	0.000286257	-1.02408	XGY2	XG pseudogene, Y-linked 2	ENSG00000288621
0.658441	7.24572	4.57374	5.55716e-05	6.06776e-05	0.556335	VASN	vasorin	ENSG00000168140
0.657779	6.2444	9.86214	9.737e-12	6.46182e-11	16.1768	HOXC8	homeobox C8	ENSG00000037965
0.656495	7.54664	9.84963	1.00687e-11	6.59626e-11	16.1429	AIFM2	apoptosis inducing factor mitochondria associated 2	ENSG00000042286
0.655519	6.92318	10.0612	5.73101e-12	4.72346e-11	16.7139	OAF	out at first homolog	ENSG00000184232
0.654905	5.95113	5.01877	1.44344e-05	1.70346e-05	1.88768	OR2T27	olfactory receptor family 2 subfamily T member 27	ENSG00000187701
0.654762	11.6159	3.92821	0.000374787	0.000383032	-1.31133	TMSB4X	thymosin beta 4 X-linked	ENSG00000205542
0.654007	7.46278	8.81513	1.72067e-10	7.14848e-10	13.2694	NAT9	N-acetyltransferase 9 (putative)	ENSG00000109065
0.653077	7.90778	7.7975	3.19696e-09	8.12759e-09	10.3173	HGH1	HGH1 homolog	ENSG00000235173
0.65215	6.5554	6.3844	2.20565e-07	3.55548e-07	6.05755	LOC105373836	uncharacterized LOC105373836	NA
0.651654	10.4808	8.45152	4.81929e-10	1.59913e-09	12.2281	UQCRH	ubiquinol-cytochrome c reductase hinge protein	ENSG00000173660
0.651571	6.58265	5.98406	7.50146e-07	1.06184e-06	4.83189	MIR6505	microRNA 6505	ENSG00000275770
0.649793	8.96339	6.58147	1.21074e-07	2.04187e-07	6.65925	COPG1	COPI coat complex subunit gamma 1	ENSG00000181789
0.649227	8.65013	7.09879	2.53916e-08	4.9335e-08	8.22916	SHC1P2	SHC adaptor protein 1 pseudogene 2	NA
0.648073	10.488	6.47606	1.66822e-07	2.73225e-07	6.33761	P4HB	prolyl 4-hydroxylase subunit beta	ENSG00000185624
0.646594	7.1573	4.61562	4.89926e-05	5.39552e-05	0.680407	MT1JP	metallothionein 1J, pseudogene	ENSG00000255986
0.646149	9.3629	5.04692	1.32473e-05	1.57794e-05	1.97271	FTH1P11	ferritin heavy chain 1 pseudogene 11	NA
0.645628	6.12203	5.14005	9.96964e-06	1.20722e-05	2.25454	LOC105375913	uncharacterized LOC105375913	NA
0.641727	7.96757	5.88651	1.01163e-06	1.40093e-06	4.53298	POP5	POP5 homolog, ribonuclease P/MRP subunit	ENSG00000167272
0.64097	6.69098	7.29758	1.40136e-08	2.91065e-08	8.82755	DAND5	DAN domain BMP antagonist family member 5	ENSG00000179284
0.640132	8.08491	3.27674	0.00234122	0.00235504	-3.07537	RPS26P13	ribosomal protein S26 pseudogene 13	NA
0.639793	8.96919	5.29525	6.20189e-06	7.67352e-06	2.72587	SLC1A5	solute carrier family 1 member 5	ENSG00000105281
0.637595	6.50055	9.97062	7.29005e-12	5.64426e-11	16.4701	LOC728975	uncharacterized LOC728975	ENSG00000254614
0.637378	7.22418	4.16725	0.000186421	0.000194411	-0.630812	MRPL33	mitochondrial ribosomal protein L33	ENSG00000243147
0.636857	8.88129	8.59053	3.2445e-10	1.1681e-09	12.628	EIF3IP1	eukaryotic translation initiation factor 3 subunit I pseudogene 1	ENSG00000237064
0.633706	8.28501	7.26316	1.55287e-08	3.17406e-08	8.72416	MXD4	MAX dimerization protein 4	ENSG00000123933
0.632536	8.57025	9.89041	9.02843e-12	6.23449e-11	16.2534	SNHG12	small nucleolar RNA host gene 12	ENSG00000197989
0.632498	6.82903	5.25648	6.98323e-06	8.6194e-06	2.60797	SNHG26	small nucleolar RNA host gene 26	ENSG00000228649
0.630842	8.90572	4.61048	4.97563e-05	5.46784e-05	0.665173	FTH1P2	ferritin heavy chain 1 pseudogene 2	ENSG00000234975
0.630653	8.22222	7.95746	2.00353e-09	5.47488e-09	10.7889	ARL8A	ADP ribosylation factor like GTPase 8A	ENSG00000143862
0.630156	7.39876	8.63686	2.8452e-10	1.06904e-09	12.7608	XYLT2	xylosyltransferase 2	ENSG00000015532
0.629179	8.59067	4.29491	0.000127825	0.000134956	-0.261663	AHNAK	AHNAK nucleoprotein	ENSG00000124942
0.628621	8.74172	4.03037	0.000278467	0.000286257	-1.02231	RPPH1	ribonuclease P RNA component H1	ENSG00000277209
0.626855	9.90974	3.787	0.000562905	0.000570723	-1.70589	TOMM7	translocase of outer mitochondrial membrane 7	ENSG00000196683
0.623798	6.67863	7.33554	1.25151e-08	2.64266e-08	8.94146	IRF1	interferon regulatory factor 1	ENSG00000125347
0.623484	10.8208	8.35914	6.2768e-10	2.00465e-09	11.961	PKM	pyruvate kinase M1/2	ENSG00000067225
0.6232	8.25823	6.86908	5.0678e-08	9.18314e-08	7.53409	TWNK	twinkle mtDNA helicase	ENSG00000107815
0.62176	7.73199	9.71204	1.45699e-11	9.30651e-11	15.7686	VASP	vasodilator stimulated phosphoprotein	ENSG00000125753
0.620417	6.51645	5.90509	9.55611e-07	1.3342e-06	4.5899	LOC105378842	uncharacterized LOC105378842	NA
0.619975	8.1781	4.68032	4.03105e-05	4.50086e-05	0.872635	PODXL	podocalyxin like	ENSG00000128567
0.618348	10.825	7.55119	6.60059e-09	1.5262e-08	9.58616	RPL28P5	ribosomal protein L28 pseudogene 5	ENSG00000213293
0.617949	7.58114	5.63282	2.20309e-06	2.93938e-06	3.75614	MIR3916	microRNA 3916	ENSG00000283881
0.617701	6.00828	4.37139	0.000101831	0.000108408	-0.0388143	LOC107986736	uncharacterized LOC107986736	NA
0.616196	7.96158	7.46369	8.55221e-09	1.90838e-08	9.32507	ARL4D	ADP ribosylation factor like GTPase 4D	ENSG00000175906
0.616112	7.37641	11.6385	1.03166e-13	2.10871e-12	20.787	GNB5	G protein subunit beta 5	ENSG00000069966
0.615586	7.27957	8.35933	6.27347e-10	2.00465e-09	11.9616	PDLIM1	PDZ and LIM domain 1	ENSG00000107438
0.615318	7.74541	6.43661	1.88117e-07	3.05167e-07	6.21712	IMPDH1	inosine monophosphate dehydrogenase 1	ENSG00000106348
0.615033	9.61236	9.26201	4.96419e-11	2.48696e-10	14.5272	UBE2L6	ubiquitin conjugating enzyme E2 L6	ENSG00000156587
0.614895	6.55753	4.56292	5.74098e-05	6.2551e-05	0.524304	IMPDH1P10	inosine monophosphate dehydrogenase 1 pseudogene 10	ENSG00000232133
0.614405	9.19886	5.16208	9.32058e-06	1.13671e-05	2.32133	LY6E	lymphocyte antigen 6 family member E	ENSG00000160932
0.613701	8.35431	6.29516	2.89592e-07	4.53932e-07	5.78463	EFEMP2	EGF containing fibulin extracellular matrix protein 2	ENSG00000172638
0.613603	8.57342	5.47307	3.59633e-06	4.57146e-06	3.2679	NOL6	nucleolar protein 6	ENSG00000165271
0.613468	8.71005	8.21155	9.59388e-10	2.86694e-09	11.5324	DNPH1	2'-deoxynucleoside 5'-phosphate N-hydrolase 1	ENSG00000112667
0.613054	5.82348	4.09312	0.000231785	0.000239277	-0.843442	MYO5BP1	myosin VB pseudogene 1	NA
0.613024	6.26992	10.4021	2.34074e-12	2.27132e-11	17.6213	LYSMD2	LysM domain containing 2	ENSG00000140280
0.613005	6.36625	7.56318	6.3707e-09	1.4865e-08	9.62189	RPL36AP19	ribosomal protein L36a pseudogene 19	NA
0.612823	7.61215	5.57383	2.64022e-06	3.45052e-06	3.57573	NOC2LP1	NOC2 like nucleolar associated transcriptional repressor pseudogene 1	ENSG00000213225
0.61269	7.67614	8.02152	1.66289e-09	4.72077e-09	10.977	ST6GALNAC4	ST6 N-acetylgalactosaminide alpha-2,6-sialyltransferase 4	ENSG00000136840
0.612684	7.82972	7.74146	3.76805e-09	9.39256e-09	10.1515	MBD1	methyl-CpG binding domain protein 1	ENSG00000141644
0.611732	10.62	4.90865	2.01829e-05	2.34397e-05	1.55585	RPS11P5	ribosomal protein S11 pseudogene 5	ENSG00000232888
0.611163	7.41672	11.1061	3.86302e-13	5.64001e-12	19.4479	CARD19	caspase recruitment domain family member 19	ENSG00000165233
0.609859	9.07746	5.38115	4.76693e-06	5.97035e-06	2.98749	BOLA3	bolA family member 3	ENSG00000163170
0.609325	8.62873	6.06231	5.90258e-07	8.71739e-07	5.07164	IGBP1	immunoglobulin binding protein 1	ENSG00000089289
0.609124	9.55487	6.27789	3.05277e-07	4.77054e-07	5.73178	FKBP10	FKBP prolyl isomerase 10	ENSG00000141756
0.608745	7.77943	9.26338	4.94548e-11	2.48696e-10	14.5311	ADAM15	ADAM metallopeptidase domain 15	ENSG00000143537
0.607541	7.44074	9.20633	5.7877e-11	2.81193e-10	14.3719	DIS3L2	DIS3 like 3'-5' exoribonuclease 2	ENSG00000144535
0.607484	6.91969	8.68997	2.4483e-10	9.4779e-10	12.9127	MIR503HG	MIR503 host gene	NA
0.607064	8.36864	9.17245	6.35551e-11	3.0352e-10	14.2772	GLRX5	glutaredoxin 5	ENSG00000182512
0.605694	9.5518	7.20038	1.87315e-08	3.73897e-08	8.53536	YKT6	YKT6 v-SNARE homolog	ENSG00000106636
0.605449	7.53683	5.86365	1.08511e-06	1.49862e-06	4.46293	ADGRA2	adhesion G protein-coupled receptor A2	ENSG00000020181
0.603931	10.2284	8.15762	1.121e-09	3.31115e-09	11.3752	DDOST	dolichyl-diphosphooligosaccharide--protein glycosyltransferase non-catalytic subunit	ENSG00000244038
0.603262	7.21972	4.55426	5.89222e-05	6.40622e-05	0.498716	CD248	CD248 molecule	ENSG00000174807
0.603129	7.38971	5.57506	2.63022e-06	3.44626e-06	3.57951	PDGFRB	platelet derived growth factor receptor beta	ENSG00000113721
0.60308	6.32222	3.84433	0.00047748	0.000485074	-1.54641	LOC101928055	uncharacterized LOC101928055	NA
0.601674	7.51079	8.00536	1.74286e-09	4.86669e-09	10.9296	TYK2	tyrosine kinase 2	ENSG00000105397
0.601627	7.72512	7.90187	2.35601e-09	6.33643e-09	10.6253	THAP7	THAP domain containing 7	ENSG00000184436
0.6007	7.59445	6.25363	3.28761e-07	5.12186e-07	5.65753	NDRG1	N-myc downstream regulated 1	ENSG00000104419
0.600677	6.09402	18.6749	5.09454e-20	1.30165e-17	35.5002	IL1R1	interleukin 1 receptor type 1	ENSG00000115594
0.59931	7.67246	13.489	1.37369e-15	7.68016e-14	25.1678	RALB	RAS like proto-oncogene B	ENSG00000144118
0.599109	10.6832	10.7564	9.37853e-13	1.10345e-11	18.5486	TMEM50A	transmembrane protein 50A	ENSG00000183726
0.599049	9.01145	8.46482	4.63982e-10	1.57503e-09	12.2664	POLR2H	RNA polymerase II, I and III subunit H	ENSG00000163882
0.597899	5.82068	4.59789	5.16793e-05	5.65484e-05	0.627827	LOC105370185	uncharacterized LOC105370185	NA
0.597364	8.17854	9.59729	1.98666e-11	1.16688e-10	15.4545	ETFB	electron transfer flavoprotein subunit beta	ENSG00000105379
0.594976	9.31224	6.50055	1.54843e-07	2.55206e-07	6.41237	DPM2	dolichyl-phosphate mannosyltransferase subunit 2, regulatory	ENSG00000136908
0.594685	8.65865	6.45394	1.78447e-07	2.90402e-07	6.27004	DDX49	DEAD-box helicase 49	ENSG00000105671
0.5944	8.71554	5.45255	3.82989e-06	4.85627e-06	3.20526	RPL41	ribosomal protein L41	ENSG00000229117
0.59387	8.59342	4.85276	2.39172e-05	2.74645e-05	1.38799	STAG3L5P-PVRIG2P-PILRB	STAG3L5P-PVRIG2P-PILRB readthrough	ENSG00000272752
0.593278	6.27486	5.41704	4.27039e-06	5.38807e-06	3.09692	LOC105375113	uncharacterized LOC105375113	NA
0.593166	8.74526	5.32616	5.64169e-06	6.99734e-06	2.81996	DOK4	docking protein 4	ENSG00000125170
0.592193	6.18463	4.93072	1.8873e-05	2.20184e-05	1.62224	LINC01311	long intergenic non-protein coding RNA 1311	NA
0.591727	7.99652	5.9497	8.33463e-07	1.17005e-06	4.72659	TMEM127	transmembrane protein 127	ENSG00000135956
0.590534	5.8564	3.86789	0.000446156	0.000455062	-1.48059	LOC105373745	uncharacterized LOC105373745	NA
0.589284	6.89255	7.1049	2.49306e-08	4.86241e-08	8.2476	NKX3-1	NK3 homeobox 1	ENSG00000167034
0.588825	7.45148	7.68423	4.45835e-09	1.07463e-08	9.9818	PLCD3	phospholipase C delta 3	ENSG00000161714
0.588255	7.46236	4.17839	0.000180406	0.000188523	-0.598766	LOC646762	uncharacterized LOC646762	NA
0.588211	8.7668	6.1702	4.24269e-07	6.37652e-07	5.40211	MOCS2	molybdenum cofactor synthesis 2	ENSG00000164172
0.587613	8.86413	8.50251	4.16709e-10	1.42912e-09	12.375	DPAGT1	dolichyl-phosphate N-acetylglucosaminephosphotransferase 1	ENSG00000172269
0.586713	10.4797	8.59037	3.246e-10	1.1681e-09	12.6276	M6PR	mannose-6-phosphate receptor, cation dependent	ENSG00000003056
0.586452	7.6612	9.57977	2.08327e-11	1.20972e-10	15.4064	TFPT	TCF3 fusion partner	ENSG00000105619
0.585482	7.04528	8.63306	2.876e-10	1.07273e-09	12.7499	PEX6	peroxisomal biogenesis factor 6	ENSG00000124587
0.585119	8.39026	5.18099	8.79713e-06	1.07802e-05	2.37869	INTS12	integrator complex subunit 12	ENSG00000138785
0.585068	10.8726	4.30348	0.000124617	0.000131854	-0.236767	COX6A1	cytochrome c oxidase subunit 6A1	ENSG00000111775
0.584252	8.60324	6.66992	9.25683e-08	1.60347e-07	6.92877	POLR2L	RNA polymerase II, I and III subunit L	ENSG00000177700
0.584161	7.76272	6.82067	5.86535e-08	1.04797e-07	7.38719	MCOLN1	mucolipin 1	ENSG00000090674
0.583294	9.82711	5.63163	2.21118e-06	2.94248e-06	3.75249	ATP5MD	ATP synthase membrane subunit DAPIT	ENSG00000173915
0.582817	7.78713	7.37244	1.12139e-08	2.40941e-08	9.05204	DHRS11	dehydrogenase/reductase 11	ENSG00000278535
0.582106	7.38136	7.29809	1.39924e-08	2.91065e-08	8.82907	PNKP	polynucleotide kinase 3'-phosphatase	ENSG00000039650
0.581285	12.2945	4.74793	3.28607e-05	3.69863e-05	1.07421	PPIB	peptidylprolyl isomerase B	ENSG00000166794
0.581247	7.91646	6.58719	1.18985e-07	2.01446e-07	6.67672	CHMP4A	charged multivesicular body protein 4A	ENSG00000254505
0.580234	7.28852	6.7444	7.38706e-08	1.29718e-07	7.15541	TNXB	tenascin XB	ENSG00000168477
Genes induced by irradiation, upregulated in control transfected SK-N-DZ cells vs SK-N-AS cells								DZ vs AS IR
logFC	AveExpr	t	P.Value	adj.P.Val	B	SYMBOL	GENENAME	ENSEMBL
-1.10913	6.62572	-6.69974	8.45679e-08	1.46987e-07	7.01956	RRN3P1	RRN3 pseudogene 1	NA
-1.10889	6.46151	-4.88795	2.1493e-05	2.48482e-05	1.49365	LOC101926969	uncharacterized LOC101926969	NA
-1.02089	6.06992	-5.10184	1.12036e-05	1.35024e-05	2.13881	LOC728715	ovostatin homolog 2	NA
-0.964097	8.19398	-10.493	1.84826e-12	1.85188e-11	17.8608	FBXO22	F-box protein 22	ENSG00000167196
-0.952707	6.95934	-9.89064	9.02274e-12	6.23449e-11	16.254	ZNF660	zinc finger protein 660	ENSG00000144792
-0.94487	7.92457	-9.95802	7.53861e-12	5.66504e-11	16.4361	ELOVL4	ELOVL fatty acid elongase 4	ENSG00000118402
-0.911595	7.23753	-5.97663	7.67433e-07	1.08033e-06	4.80911	LOC646903	uncharacterized LOC646903	NA
-0.895092	6.88553	-8.22599	9.20277e-10	2.76624e-09	11.5744	STX7	syntaxin 7	ENSG00000079950
-0.89157	8.03506	-8.96468	1.1319e-10	4.90203e-10	13.6931	DDIAS	DNA damage induced apoptosis suppressor	ENSG00000165490
-0.881364	6.36953	-7.39632	1.04452e-08	2.26166e-08	9.12359	SGO1-AS1	SGO1 antisense RNA 1	ENSG00000231304
-0.870775	8.36564	-6.05711	5.99743e-07	8.78134e-07	5.05569	NDC80	NDC80 kinetochore complex component	ENSG00000080986
-0.866961	6.22091	-6.46044	1.74951e-07	2.85623e-07	6.28989	LINC01719	long intergenic non-protein coding RNA 1719	NA
-0.862046	8.16814	-5.61971	2.2935e-06	3.03621e-06	3.71605	CENPK	centromere protein K	ENSG00000123219
-0.85766	7.35215	-8.96466	1.13198e-10	4.90203e-10	13.693	RFX7	regulatory factor X7	ENSG00000181827
-0.851622	8.10764	-10.8722	6.98002e-13	8.91697e-12	18.848	FRG1HP	FSHD region gene 1 family member H, pseudogene	NA
-0.850749	8.29806	-7.48606	8.00354e-09	1.80965e-08	9.39189	CKAP2L	cytoskeleton associated protein 2 like	ENSG00000169607
-0.849941	7.71204	-5.79207	1.35154e-06	1.85157e-06	4.24365	ALG10	ALG10 alpha-1,2-glucosyltransferase	ENSG00000139133
-0.827099	9.2422	-9.25348	5.08212e-11	2.52133e-10	14.5035	NEMP1	nuclear envelope integral membrane protein 1	ENSG00000166881
-0.824058	10.3846	-7.13908	2.25034e-08	4.45706e-08	8.35069	PITPNB	phosphatidylinositol transfer protein beta	ENSG00000180957
-0.823654	7.45404	-7.20599	1.84202e-08	3.69127e-08	8.55223	ARL6IP1P2	ADP ribosylation factor like GTPase 6 interacting protein 1 pseudogene 2	NA
-0.819408	8.38096	-4.94617	1.80064e-05	2.11039e-05	1.66875	TTK	TTK protein kinase	ENSG00000112742
-0.815212	7.4914	-7.69051	4.37681e-09	1.05998e-08	10.0004	AASS	aminoadipate-semialdehyde synthase	ENSG00000008311
-0.81418	5.73107	-6.34907	2.45657e-07	3.89847e-07	5.94953	RPL26P19	ribosomal protein L26 pseudogene 19	ENSG00000226221
-0.814072	7.86296	-7.76767	3.48918e-09	8.78311e-09	10.229	SLC39A10	solute carrier family 39 member 10	ENSG00000196950
-0.803296	6.84474	-7.84638	2.7707e-09	7.18695e-09	10.4617	ZNF138	zinc finger protein 138	ENSG00000197008
-0.799955	7.82157	-8.59443	3.20882e-10	1.1681e-09	12.6392	DNA2	DNA replication helicase/nuclease 2	ENSG00000138346
-0.799672	6.09206	-10.3997	2.35577e-12	2.27132e-11	17.6149	PURPL	p53 upregulated regulator of p53 levels	ENSG00000250337
-0.795168	8.15706	-7.27063	1.51865e-08	3.11658e-08	8.74661	ZNF724	zinc finger protein 724	ENSG00000196081
-0.794013	7.56152	-7.03775	3.04969e-08	5.68756e-08	8.04482	FAM76B	family with sequence similarity 76 member B	ENSG00000077458
-0.784663	7.82552	-6.93084	4.20669e-08	7.64988e-08	7.72133	ZNF141	zinc finger protein 141	ENSG00000131127
-0.784102	7.44932	-5.78771	1.36972e-06	1.86648e-06	4.23031	CEP162	centrosomal protein 162	ENSG00000135315
-0.783956	7.28299	-4.85086	2.40554e-05	2.75612e-05	1.38229	FAM27E4	family with sequence similarity 27 member E4	NA
-0.783379	7.09849	-9.38206	3.57042e-11	1.90755e-10	14.8609	GABPB1-AS1	GABPB1 antisense RNA 1	NA
-0.779686	7.45654	-6.21759	3.67033e-07	5.63225e-07	5.54723	PUS7L	pseudouridine synthase 7 like	ENSG00000129317
-0.773096	10.2942	-9.08567	8.08278e-11	3.72972e-10	14.0338	SEC63	SEC63 homolog, protein translocation regulator	ENSG00000025796
-0.772656	7.28637	-8.39236	5.70714e-10	1.86945e-09	12.0572	APAF1	apoptotic peptidase activating factor 1	ENSG00000120868
-0.766039	8.28619	-6.3758	2.26426e-07	3.62708e-07	6.03125	SNORD15A	small nucleolar RNA, C/D box 15A	ENSG00000206941
-0.763178	5.57237	-4.94164	1.82562e-05	2.13476e-05	1.65512	LOC105379195	uncharacterized LOC105379195	NA
-0.762964	7.11746	-7.53674	6.88868e-09	1.57148e-08	9.54309	ZNF33B	zinc finger protein 33B	ENSG00000196693
-0.760153	6.38599	-5.7445	1.56392e-06	2.10861e-06	4.09796	WASL-DT	WASL divergent transcript	NA
-0.759142	6.39922	-5.78801	1.36849e-06	1.86648e-06	4.23121	LOC105372989	uncharacterized LOC105372989	NA
-0.75289	6.31032	-4.63722	4.59061e-05	5.07749e-05	0.744513	LOC107985652	uncharacterized LOC107985652	NA
-0.752507	6.59108	-9.10509	7.65881e-11	3.59051e-10	14.0884	LOC730110	zinc finger protein 492 pseudogene	NA
-0.75156	6.94744	-8.69879	2.38804e-10	9.31517e-10	12.9379	TSPAN12	tetraspanin 12	ENSG00000106025
-0.751359	9.77071	-10.0147	6.48338e-12	5.17657e-11	16.5889	YWHAH	tyrosine 3-monooxygenase/tryptophan 5-monooxygenase activation protein eta	ENSG00000128245
-0.750487	7.34443	-8.46374	4.65419e-10	1.57503e-09	12.2633	ATP7A	ATPase copper transporting alpha	ENSG00000165240
-0.749824	7.42204	-7.46039	8.63619e-09	1.91874e-08	9.31522	GALNT13	polypeptide N-acetylgalactosaminyltransferase 13	ENSG00000144278
-0.745104	7.99936	-9.37317	3.65832e-11	1.90755e-10	14.8363	IKZF5	IKAROS family zinc finger 5	ENSG00000095574
-0.743193	7.46922	-6.64321	1.00379e-07	1.72127e-07	6.84743	KIF15	kinesin family member 15	ENSG00000163808
-0.741202	7.21789	-10.0321	6.19116e-12	5.02172e-11	16.6356	KIAA1841	KIAA1841	ENSG00000162929
-0.738117	8.40341	-7.75129	3.66097e-09	9.17038e-09	10.1806	HNRNPA3	heterogeneous nuclear ribonucleoprotein A3	ENSG00000170144
-0.737986	7.63071	-7.77623	3.40263e-09	8.60766e-09	10.2544	C18orf54	chromosome 18 open reading frame 54	ENSG00000166845
-0.737561	6.80665	-8.71075	2.30873e-10	9.14542e-10	12.9721	DIPK1A	divergent protein kinase domain 1A	ENSG00000154511
-0.736433	8.66168	-8.80499	1.77043e-10	7.29587e-10	13.2406	SINHCAF	SIN3-HDAC complex associated factor	ENSG00000139146
-0.73531	7.20671	-9.74668	1.32724e-11	8.58503e-11	15.863	ZBTB24	zinc finger and BTB domain containing 24	ENSG00000112365
-0.734368	9.78334	-4.88546	2.16561e-05	2.49803e-05	1.48617	HSPA13	heat shock protein family A (Hsp70) member 13	ENSG00000155304
-0.734199	8.359	-11.3812	1.94423e-13	3.54823e-12	20.1442	SRSF8	serine and arginine rich splicing factor 8	ENSG00000263465
-0.731753	7.69951	-9.62417	1.8472e-11	1.12371e-10	15.5282	ARFGAP3	ADP ribosylation factor GTPase activating protein 3	ENSG00000242247
-0.731475	6.9607	-11.2904	2.43592e-13	4.07226e-12	19.9156	ZNF568	zinc finger protein 568	ENSG00000198453
-0.728578	8.13457	-12.2421	2.4104e-14	6.84285e-13	22.2618	INSIG1	insulin induced gene 1	ENSG00000186480
-0.727667	7.59168	-7.54269	6.76849e-09	1.55098e-08	9.56083	NR2C1	nuclear receptor subfamily 2 group C member 1	ENSG00000120798
-0.726541	9.16998	-7.54534	6.71563e-09	1.5458e-08	9.56874	CD164	CD164 molecule	ENSG00000135535
-0.724482	7.19591	-9.20351	5.83297e-11	2.81193e-10	14.364	ZNF736	zinc finger protein 736	ENSG00000234444
-0.724061	7.3839	-7.32978	1.27317e-08	2.67733e-08	8.92417	KIAA1143	KIAA1143	ENSG00000163807
-0.721134	6.55411	-10.6816	1.13615e-12	1.26035e-11	18.3541	PURG	purine rich element binding protein G	ENSG00000172733
-0.71744	7.27364	-8.45442	4.77955e-10	1.59913e-09	12.2364	FGD6	FYVE, RhoGEF and PH domain containing 6	ENSG00000180263
-0.717283	6.86525	-6.38277	2.21663e-07	3.56194e-07	6.05257	MTFR2	mitochondrial fission regulator 2	ENSG00000146410
-0.715149	9.44692	-8.27609	7.96678e-10	2.48233e-09	11.7201	STT3B	STT3 oligosaccharyltransferase complex catalytic subunit B	ENSG00000163527
-0.714244	7.10628	-4.44057	8.2839e-05	8.8558e-05	0.163794	ZNF92	zinc finger protein 92	ENSG00000146757
-0.714234	6.18861	-7.04924	2.94624e-08	5.51476e-08	8.07954	MIR6755	microRNA 6755	ENSG00000283744
-0.713597	8.07143	-8.98248	1.07708e-10	4.78598e-10	13.7433	CENPI	centromere protein I	ENSG00000102384
-0.712967	7.02287	-6.51763	1.47003e-07	2.43103e-07	6.4645	LOC441666	zinc finger protein 91 pseudogene	ENSG00000215146
-0.710565	6.41676	-7.88446	2.47889e-09	6.59747e-09	10.574	TBC1D32	TBC1 domain family member 32	ENSG00000146350
-0.708953	7.70335	-11.9278	5.11126e-14	1.23845e-12	21.4993	HAUS2	HAUS augmin like complex subunit 2	ENSG00000137814
-0.708342	6.76874	-9.29907	4.4831e-11	2.314e-10	14.6304	LOC101929977	uncharacterized LOC101929977	NA
-0.706341	9.15514	-8.81856	1.7042e-10	7.13809e-10	13.2791	RBM39	RNA binding motif protein 39	ENSG00000131051
-0.704615	6.6422	-11.9102	5.33187e-14	1.23845e-12	21.4565	SERAC1	serine active site containing 1	ENSG00000122335
-0.704086	7.37215	-5.7029	1.77685e-06	2.38312e-06	3.9706	ZNF675	zinc finger protein 675	ENSG00000197372
-0.702484	7.77987	-10.7513	9.50132e-13	1.10345e-11	18.5354	ZNF79	zinc finger protein 79	ENSG00000196152
-0.701126	6.51572	-10.8265	7.84033e-13	9.77172e-12	18.7302	SIX4	SIX homeobox 4	ENSG00000100625
-0.701102	6.30976	-11.944	4.91569e-14	1.23845e-12	21.5389	LRRC34	leucine rich repeat containing 34	ENSG00000171757
-0.700443	9.10218	-6.13566	4.7155e-07	7.04568e-07	5.29634	GJC1	gap junction protein gamma 1	ENSG00000182963
-0.700121	7.17867	-4.49504	7.03786e-05	7.57126e-05	0.323967	SNORA1	small nucleolar RNA, H/ACA box 1	ENSG00000206834
-0.700106	6.91811	-8.2564	8.43112e-10	2.57982e-09	11.6629	ZNF334	zinc finger protein 334	ENSG00000198185
-0.700047	6.48131	-8.50732	4.11042e-10	1.41921e-09	12.3889	TUBE1	tubulin epsilon 1	ENSG00000074935
-0.699756	5.67616	-5.55542	2.79362e-06	3.6049e-06	3.51945	LOC105377021	uncharacterized LOC105377021	NA
-0.69956	7.452	-10.1216	4.88588e-12	4.30463e-11	16.8755	DCP1B	decapping mRNA 1B	ENSG00000151065
-0.699328	6.15624	-7.49784	7.72922e-09	1.75539e-08	9.42704	LOC105376110	uncharacterized LOC105376110	NA
-0.698636	6.38627	-8.60974	3.07245e-10	1.1377e-09	12.6831	H3C6	H3 clustered histone 6	ENSG00000274750
-0.698133	9.86682	-7.92435	2.20647e-09	5.96563e-09	10.6915	BCAT1	branched chain amino acid transaminase 1	ENSG00000060982
-0.697776	7.94213	-4.766	3.11115e-05	3.51726e-05	1.1282	RIOK2	RIO kinase 2	ENSG00000058729
-0.697592	7.97932	-7.3722	1.12219e-08	2.40941e-08	9.05133	AKAP9	A-kinase anchoring protein 9	ENSG00000127914
-0.697469	7.63862	-8.36367	6.19597e-10	2.00389e-09	11.9741	UBQLN2	ubiquilin 2	ENSG00000188021
-0.697421	8.02182	-6.25017	3.3225e-07	5.16049e-07	5.64696	ZNF280C	zinc finger protein 280C	ENSG00000056277
-0.695746	7.94049	-7.2208	1.76226e-08	3.57347e-08	8.5968	PM20D2	peptidase M20 domain containing 2	ENSG00000146281
-0.695537	5.57302	-4.79134	2.88133e-05	3.26466e-05	1.20398	RNU6-1024P	RNA, U6 small nuclear 1024, pseudogene	ENSG00000206926
-0.695536	6.62872	-7.05646	2.88309e-08	5.43637e-08	8.10134	ADGRB3	adhesion G protein-coupled receptor B3	ENSG00000135298
-0.695336	7.33483	-7.71722	4.0462e-09	9.88918e-09	10.0796	STXBP4	syntaxin binding protein 4	ENSG00000166263
-0.694545	8.86868	-5.74507	1.56116e-06	2.10861e-06	4.09973	TDG	thymine DNA glycosylase	ENSG00000139372
-0.694249	6.86321	-8.06029	1.48589e-09	4.26567e-09	11.0906	CIDECP1	cell death inducing DFFA like effector c pseudogene 1	ENSG00000186162
-0.693611	6.47646	-14.9551	5.90862e-17	5.03218e-15	28.3581	FAM227A	family with sequence similarity 227 member A	ENSG00000184949
-0.693145	5.57817	-8.77862	1.90676e-10	7.73297e-10	13.1655	TMEM271	transmembrane protein 271	ENSG00000273238
-0.692164	9.12053	-7.07099	2.75997e-08	5.24292e-08	8.14525	OSBPL8	oxysterol binding protein like 8	ENSG00000091039
-0.691793	7.28278	-5.05736	1.28321e-05	1.53206e-05	2.00427	TMEM126B	transmembrane protein 126B	ENSG00000171204
-0.691018	7.48445	-4.92707	1.90834e-05	2.22132e-05	1.61127	RPL26P21	ribosomal protein L26 pseudogene 21	NA
-0.69088	8.42883	-8.14007	1.17933e-09	3.46342e-09	11.3239	LOC105373759	uncharacterized LOC105373759	NA
-0.682637	10.7924	-7.08648	2.63467e-08	5.04238e-08	8.19201	CSE1L	chromosome segregation 1 like	ENSG00000124207
-0.681404	7.4489	-8.01431	1.69808e-09	4.79404e-09	10.9558	LOC100133315	XRCC1 N-terminal domain containing 1-like	ENSG00000254469
-0.681285	7.98729	-7.85845	2.67459e-09	6.97303e-09	10.4973	BBIP1	BBSome interacting protein 1	ENSG00000214413
-0.678319	5.53256	-4.52161	6.49904e-05	7.02117e-05	0.402285	MIR1279	microRNA 1279	ENSG00000283476
-0.677609	5.70503	-8.29794	7.4818e-10	2.36e-09	11.7836	ZNF90P1	zinc finger protein 90 pseudogene 1	NA
-0.677069	7.83261	-12.3696	1.78346e-14	5.69592e-13	22.5674	ABLIM1	actin binding LIM protein 1	ENSG00000099204
-0.676922	9.13319	-10.8865	6.73089e-13	8.8192e-12	18.8849	DNM1L	dynamin 1 like	ENSG00000087470
-0.676774	9.4706	-3.08887	0.00387501	0.00388261	-3.55339	LOC112267967	uncharacterized LOC112267967	NA
-0.675786	8.08474	-11.1412	3.5377e-13	5.31695e-12	19.5372	SNAPC3	small nuclear RNA activating complex polypeptide 3	ENSG00000164975
-0.675782	6.30036	-4.23614	0.000152128	0.000159298	-0.432061	PCDHGA9	protocadherin gamma subfamily A, 9	ENSG00000261934
-0.675605	6.36456	-6.2111	3.74387e-07	5.72789e-07	5.52736	LOC105373174	uncharacterized LOC105373174	ENSG00000287729
-0.675365	7.03366	-5.418	4.25783e-06	5.38553e-06	3.09985	CXADRP3	CXADR pseudogene 3	ENSG00000265766
-0.67505	6.75758	-8.0097	1.72101e-09	4.83205e-09	10.9423	GPCPD1	glycerophosphocholine phosphodiesterase 1	ENSG00000125772
-0.674371	6.96345	-9.93546	8.00567e-12	5.92883e-11	16.3752	TSPYL1	TSPY like 1	ENSG00000189241
-0.673718	7.64237	-5.98728	7.42785e-07	1.05434e-06	4.84175	ING3	inhibitor of growth family member 3	ENSG00000071243
-0.673129	6.33198	-13.5527	1.19227e-15	7.61564e-14	25.3115	RUNDC3B	RUN domain containing 3B	ENSG00000105784
-0.673034	8.65004	-9.90306	8.72842e-12	6.19476e-11	16.2876	PDCD6IP	programmed cell death 6 interacting protein	ENSG00000170248
-0.67273	8.56247	-4.68934	3.92278e-05	4.39592e-05	0.899482	RPL23AP5	ribosomal protein L23a pseudogene 5	ENSG00000236829
-0.67268	8.09448	-6.39667	2.12463e-07	3.43571e-07	6.09507	CCDC91	coiled-coil domain containing 91	ENSG00000123106
-0.67114	7.86141	-4.62721	4.73127e-05	5.22177e-05	0.714777	LOC100132797	FMR1 autosomal homolog 1 pseudogene	NA
-0.670428	5.74228	-6.6656	9.37896e-08	1.61741e-07	6.91561	MIR5579	microRNA 5579	ENSG00000266570
-0.670154	8.79066	-4.68007	4.03404e-05	4.50086e-05	0.871905	KIF20B	kinesin family member 20B	ENSG00000138182
-0.67006	7.24859	-5.40097	4.486e-06	5.63229e-06	3.04791	MEG8	maternally expressed 8, small nucleolar RNA host gene	NA
-0.670009	7.86224	-6.81695	5.93169e-08	1.05613e-07	7.37588	WDR48	WD repeat domain 48	ENSG00000114742
-0.669128	6.45639	-6.0405	6.31036e-07	9.18688e-07	5.00481	HMGN5	high mobility group nucleosome binding domain 5	ENSG00000198157
-0.668545	8.45275	-6.56363	1.27815e-07	2.13442e-07	6.60487	ZSWIM1	zinc finger SWIM-type containing 1	ENSG00000168612
-0.668015	6.8304	-6.01364	6.85147e-07	9.86226e-07	4.92252	LOC100421597	peptidylprolyl isomerase like 4 pseudogene	NA
-0.667931	9.12914	-7.0886	2.61798e-08	5.04238e-08	8.1984	KIF2A	kinesin family member 2A	ENSG00000068796
-0.667261	7.20354	-7.42344	9.63693e-09	2.11351e-08	9.20474	ABCB1	ATP binding cassette subfamily B member 1	ENSG00000085563
-0.667065	7.09644	-9.14502	6.85661e-11	3.24419e-10	14.2003	RDH10	retinol dehydrogenase 10	ENSG00000121039
-0.666928	7.34803	-9.69626	1.52029e-11	9.47401e-11	15.7255	CEP120	centrosomal protein 120	ENSG00000168944
-0.666462	6.51608	-6.61869	1.08132e-07	1.84186e-07	6.77273	FLJ39095	uncharacterized LOC400812	NA
-0.66561	5.92587	-9.91481	8.459e-12	6.17507e-11	16.3194	SMIM18	small integral membrane protein 18	ENSG00000253457
-0.664327	7.29502	-7.36625	1.14222e-08	2.43198e-08	9.0335	KIN	Kin17 DNA and RNA binding protein	ENSG00000151657
-0.663323	7.54378	-9.37606	3.62955e-11	1.90755e-10	14.8443	TXNDC15	thioredoxin domain containing 15	ENSG00000113621
-0.663183	8.235	-8.53861	3.76025e-10	1.30714e-09	12.4789	MAPRE1P2	MAPRE1 pseudogene 2	NA
-0.662928	8.10621	-12.2601	2.31001e-14	6.84285e-13	22.305	IDI1	isopentenyl-diphosphate delta isomerase 1	ENSG00000067064
-0.662921	7.58991	-7.00123	3.40352e-08	6.2787e-08	7.9344	POLH	DNA polymerase eta	ENSG00000170734
-0.6627	7.70044	-7.81262	3.05847e-09	7.81438e-09	10.362	XPNPEP3	X-prolyl aminopeptidase 3	ENSG00000196236
-0.662408	7.97255	-7.57905	6.07895e-09	1.42493e-08	9.66915	KIF3A	kinesin family member 3A	ENSG00000131437
-0.66174	7.13454	-7.94826	2.05793e-09	5.59364e-09	10.7618	YWHAEP1	tyrosine 3-monooxygenase/tryptophan 5-monooxygenase activation protein epsilon pseudogene 1	NA
-0.661193	6.87523	-6.24768	3.34795e-07	5.18425e-07	5.63931	LINC02820	long intergenic non-protein coding RNA 2820	NA
-0.659376	8.16031	-8.58128	3.33083e-10	1.18198e-09	12.6015	DICER1	dicer 1, ribonuclease III	ENSG00000100697
-0.658621	6.473	-5.572	2.65506e-06	3.46106e-06	3.57014	LOC100418730	T-box 20 pseudogene	NA
-0.658254	7.90033	-5.15254	9.59624e-06	1.16754e-05	2.29241	TBC1D15	TBC1 domain family member 15	ENSG00000121749
-0.657936	8.16714	-7.73184	3.87604e-09	9.61484e-09	10.123	CASD1	CAS1 domain containing 1	ENSG00000127995
-0.657111	7.16686	-7.01151	3.29987e-08	6.13177e-08	7.96551	HDX	highly divergent homeobox	ENSG00000165259
-0.657064	7.25839	-10.6999	1.08386e-12	1.23078e-11	18.4019	EED	embryonic ectoderm development	ENSG00000074266
-0.656939	8.1725	-7.10762	2.47283e-08	4.84145e-08	8.2558	SUGT1	SGT1 homolog, MIS12 kinetochore complex assembly cochaperone	ENSG00000165416
-0.656852	8.30818	-6.17321	4.20386e-07	6.35553e-07	5.41132	CDC40	cell division cycle 40	ENSG00000168438
-0.656681	7.75361	-6.09889	5.27729e-07	7.83924e-07	5.18368	NUP50P1	nucleoporin 50 pseudogene 1	NA
-0.656371	6.20362	-11.2848	2.47045e-13	4.07226e-12	19.9013	LERFS	lncRNA negative regulator of fibroblast-like synoviocyte migration, SYNCRIP interacting	NA
-0.65611	7.96462	-8.65315	2.71695e-10	1.03609e-09	12.8074	AKAP11	A-kinase anchoring protein 11	ENSG00000023516
-0.655957	7.89681	-2.92919	0.00588525	0.00588525	-3.94675	PCNA-AS1	PCNA antisense RNA 1	NA
-0.655621	6.63725	-7.11618	2.41013e-08	4.75512e-08	8.28165	LINC01560	long intergenic non-protein coding RNA 1560	NA
-0.655333	6.39567	-6.52851	1.42217e-07	2.35952e-07	6.49771	RPS15AP18	ribosomal protein S15a pseudogene 18	ENSG00000242979
-0.655252	6.47347	-4.87489	2.23631e-05	2.57377e-05	1.4544	LOC105372573	uncharacterized LOC105372573	ENSG00000286117
-0.654888	7.18836	-6.85683	5.25868e-08	9.46192e-08	7.49692	ZNF616	zinc finger protein 616	ENSG00000204611
-0.65422	7.89325	-7.71661	4.0535e-09	9.88918e-09	10.0778	PIAS1	protein inhibitor of activated STAT 1	ENSG00000033800
-0.65408	7.60342	-7.36816	1.13573e-08	2.42827e-08	9.03925	TIPIN	TIMELESS interacting protein	ENSG00000075131
-0.653402	8.17454	-6.03013	6.51407e-07	9.42972e-07	4.97303	POU2F1	POU class 2 homeobox 1	ENSG00000143190
-0.653315	7.61306	-5.40241	4.4662e-06	5.62126e-06	3.05231	SCML1	Scm polycomb group protein like 1	ENSG00000047634
-0.653152	9.19835	-6.96953	3.74406e-08	6.85739e-08	7.83849	RBM12	RNA binding motif protein 12	ENSG00000244462
-0.65199	7.95252	-5.08751	1.17043e-05	1.40727e-05	2.09546	IFT80	intraflagellar transport 80	ENSG00000068885
-0.65168	8.5864	-5.838	1.17391e-06	1.61689e-06	4.38436	CPNE8	copine 8	ENSG00000139117
-0.651571	6.31413	-4.12739	0.000209608	0.000217703	-0.745301	HNRNPA1P63	heterogeneous nuclear ribonucleoprotein A1 pseudogene 63	NA
-0.649436	8.71042	-5.4753	3.57188e-06	4.5517e-06	3.27469	POMK	protein O-mannose kinase	ENSG00000185900
-0.64915	5.98314	-6.99754	3.44153e-08	6.32599e-08	7.92323	ZNF516-DT	ZNF516 divergent transcript	ENSG00000275763
-0.647966	6.69703	-5.99691	7.21188e-07	1.02654e-06	4.87125	CCDC15	coiled-coil domain containing 15	ENSG00000149548
-0.647586	6.99171	-6.29666	2.8827e-07	4.53249e-07	5.78922	BBS10	Bardet-Biedl syndrome 10	ENSG00000179941
-0.646577	9.44128	-10.2245	3.72568e-12	3.34004e-11	17.1503	PANK3	pantothenate kinase 3	ENSG00000120137
-0.64504	7.59867	-8.24845	8.62635e-10	2.60832e-09	11.6398	MRPS25	mitochondrial ribosomal protein S25	ENSG00000131368
-0.645033	9.08928	-6.05784	5.98399e-07	8.78134e-07	5.05794	KLF7	Kruppel like factor 7	ENSG00000118263
-0.644805	8.83058	-9.51176	2.50602e-11	1.42286e-10	15.2193	MTMR2	myotubularin related protein 2	ENSG00000087053
-0.644694	6.40033	-7.053	2.91315e-08	5.47287e-08	8.09091	LOC105373868	uncharacterized LOC105373868	NA
-0.644032	6.75048	-9.87412	9.43012e-12	6.35733e-11	16.2093	ZNF14	zinc finger protein 14	ENSG00000105708
-0.643978	7.48599	-6.35832	2.38822e-07	3.8018e-07	5.97782	CEP152	centrosomal protein 152	ENSG00000103995
-0.643901	7.55126	-7.96973	1.93322e-09	5.31115e-09	10.8249	ADAL	adenosine deaminase like	ENSG00000168803
-0.642217	8.70099	-6.07173	5.73489e-07	8.49428e-07	5.10048	FXR1	FMR1 autosomal homolog 1	ENSG00000114416
-0.641564	7.22823	-10.9579	5.61501e-13	7.76259e-12	19.0687	METTL6	methyltransferase like 6	ENSG00000206562
-0.641506	6.64176	-5.071	1.23091e-05	1.47651e-05	2.04551	ZNF670	zinc finger protein 670	ENSG00000277462
-0.641291	6.75089	-4.13885	0.000202669	0.000210924	-0.712433	MIR1204	microRNA 1204	ENSG00000283710
-0.640294	8.36056	-7.63839	5.10274e-09	1.21279e-08	9.84566	CHASERR	CHD2 adjacent suppressive regulatory RNA	NA
-0.639143	7.42546	-10.5084	1.77578e-12	1.81485e-11	17.9013	MED23	mediator complex subunit 23	ENSG00000112282
-0.638705	9.60533	-13.2784	2.20026e-15	1.02212e-13	24.69	CTNNB1	catenin beta 1	ENSG00000168036
-0.638474	9.71355	-6.70758	8.25825e-08	1.44026e-07	7.04342	TARS1	threonyl-tRNA synthetase 1	ENSG00000113407
-0.638169	8.38319	-6.49953	1.55321e-07	2.55206e-07	6.40928	SMARCAD1	SWI/SNF-related, matrix-associated actin-dependent regulator of chromatin, subfamily a, containing DEAD/H box 1	ENSG00000163104
-0.637578	8.14917	-9.70365	1.49032e-11	9.40187e-11	15.7457	WTAP	WT1 associated protein	ENSG00000146457
-0.637208	9.24484	-9.56093	2.19253e-11	1.25886e-10	15.3546	ARID2	AT-rich interaction domain 2	ENSG00000189079
-0.637191	8.71709	-6.01992	6.72108e-07	9.7019e-07	4.94174	BRIP1	BRCA1 interacting protein C-terminal helicase 1	ENSG00000136492
-0.637069	6.78598	-4.70159	3.78029e-05	4.24556e-05	0.935972	NUS1P1	NUS1 pseudogene 1	NA
-0.636946	8.39021	-8.74967	2.06869e-10	8.25861e-10	13.0831	BRCA1	BRCA1 DNA repair associated	ENSG00000012048
-0.636846	7.60956	-5.11651	1.07127e-05	1.29414e-05	2.18324	DENND6A	DENN domain containing 6A	ENSG00000174839
-0.636304	7.16315	-6.66484	9.4006e-08	1.61741e-07	6.9133	LOC107986871	ubiquitin-conjugating enzyme E2 variant 1 pseudogene	NA
-0.635945	5.79992	-5.70811	1.74866e-06	2.35149e-06	3.98655	LOC105373156	uncharacterized LOC105373156	NA
-0.635944	7.7509	-5.74991	1.53818e-06	2.08491e-06	4.11452	MPHOSPH6	M-phase phosphoprotein 6	ENSG00000135698
-0.634998	6.62721	-10.6737	1.15923e-12	1.26035e-11	18.3337	ABHD3	abhydrolase domain containing 3, phospholipase	ENSG00000158201
-0.634439	6.2241	-11.3091	2.3255e-13	4.07226e-12	19.9626	CHCHD7	coiled-coil-helix-coiled-coil-helix domain containing 7	ENSG00000170791
-0.634164	8.3925	-4.28202	0.000132806	0.000139925	-0.2991	LRRC40	leucine rich repeat containing 40	ENSG00000066557
-0.633512	6.69558	-10.108	5.06412e-12	4.38604e-11	16.8392	ZNF586	zinc finger protein 586	ENSG00000083828
-0.633114	6.66486	-7.31381	1.3352e-08	2.79627e-08	8.87626	LOC105373077	uncharacterized LOC105373077	NA
-0.632377	7.66074	-7.4068	1.01252e-08	2.20169e-08	9.15494	PEX1	peroxisomal biogenesis factor 1	ENSG00000127980
-0.631977	8.47655	-5.06555	1.25157e-05	1.49778e-05	2.02901	KIAA1586	KIAA1586	ENSG00000168116
-0.631802	7.40727	-8.66662	2.61532e-10	1.00483e-09	12.846	ZFP30	ZFP30 zinc finger protein	ENSG00000120784
-0.631097	8.66368	-7.22949	1.71708e-08	3.49574e-08	8.62294	PLAGL2	PLAG1 like zinc finger 2	ENSG00000126003
-0.630288	7.551	-4.3216	0.000118088	0.000125453	-0.184031	TRIQK	triple QxxK/R motif containing	ENSG00000205133
-0.629872	8.003	-7.7236	3.97099e-09	9.80278e-09	10.0986	REV3L	REV3 like, DNA directed polymerase zeta catalytic subunit	ENSG00000009413
-0.629819	6.96299	-5.89452	9.87089e-07	1.37439e-06	4.55752	NUS1	NUS1 dehydrodolichyl diphosphate synthase subunit	ENSG00000153989
-0.629485	8.32046	-7.56062	6.41908e-09	1.49098e-08	9.61427	UBL3	ubiquitin like 3	ENSG00000122042
-0.629296	6.29756	-9.27406	4.80222e-11	2.45393e-10	14.5608	EFCAB10	EF-hand calcium binding domain 10	ENSG00000185055
-0.628417	6.11973	-11.7828	7.25919e-14	1.6128e-12	21.1435	LOC100129203	uncharacterized LOC100129203	NA
-0.627519	7.7341	-7.71572	4.06405e-09	9.88918e-09	10.0752	ATP5F1E	ATP synthase F1 subunit epsilon	ENSG00000124172
-0.627333	7.98263	-9.45721	2.90756e-11	1.61496e-10	15.0688	RSBN1L	round spermatid basic protein 1 like	ENSG00000187257
-0.627246	6.8373	-12.3944	1.68224e-14	5.69592e-13	22.6267	MCM9	minichromosome maintenance 9 homologous recombination repair factor	ENSG00000111877
-0.627171	7.39041	-7.16558	2.07866e-08	4.13305e-08	8.43056	LOC730101	uncharacterized LOC730101	ENSG00000216775
-0.626446	6.58767	-18.3405	9.15655e-20	1.55967e-17	34.9077	RBFOX1	RNA binding fox-1 homolog 1	ENSG00000078328
-0.625375	8.80144	-6.36067	2.37117e-07	3.78647e-07	5.985	KIF11	kinesin family member 11	ENSG00000138160
-0.625072	9.47935	-6.587	1.19054e-07	2.01446e-07	6.67613	SMC4	structural maintenance of chromosomes 4	ENSG00000113810
-0.624513	7.29455	-4.26411	0.000140045	0.000147249	-0.351067	LOC105369699	uncharacterized LOC105369699	NA
-0.622286	8.22936	-9.01272	9.9001e-11	4.47695e-10	13.8286	MAPK1	mitogen-activated protein kinase 1	ENSG00000100030
-0.621234	6.99116	-8.2513	8.55584e-10	2.6024e-09	11.6481	OXNAD1	oxidoreductase NAD binding domain containing 1	ENSG00000154814
-0.621065	7.79118	-8.40553	5.49622e-10	1.81198e-09	12.0952	RNF185	ring finger protein 185	ENSG00000138942
-0.620788	8.70185	-6.76196	7.00479e-08	1.23429e-07	7.20879	PDCL	phosducin like	ENSG00000136940
-0.620192	6.36626	-7.09679	2.55441e-08	4.94432e-08	8.22314	LOC107984578	uncharacterized LOC107984578	NA
-0.620055	9.62745	-10.0742	5.53699e-12	4.71567e-11	16.7488	KIF20A	kinesin family member 20A	ENSG00000112984
-0.619134	9.72883	-11.5442	1.30005e-13	2.48679e-12	20.5524	CLNS1A	chloride nucleotide-sensitive channel 1A	ENSG00000074201
-0.618992	8.93191	-4.48816	7.18441e-05	7.71267e-05	0.303708	SCAMP1	secretory carrier membrane protein 1	ENSG00000085365
-0.618871	6.37161	-11.2298	2.83386e-13	4.52531e-12	19.7621	ZNF571-AS1	ZNF571 antisense RNA 1	ENSG00000267470
-0.618264	8.81402	-5.19966	8.30887e-06	1.02309e-05	2.43537	PHF6	PHD finger protein 6	ENSG00000156531
-0.618038	6.2386	-4.66189	4.2615e-05	4.74429e-05	0.817827	LOC107984298	uncharacterized LOC107984298	NA
-0.617975	8.86335	-4.8077	2.74199e-05	3.13458e-05	1.25294	TRIAP1	TP53 regulated inhibitor of apoptosis 1	ENSG00000170855
-0.616975	9.64651	-11.1907	3.12486e-13	4.8388e-12	19.663	SEPTIN11	septin 11	ENSG00000138758
-0.616511	8.17377	-7.08735	2.62782e-08	5.04238e-08	8.19462	FAM8A1	family with sequence similarity 8 member A1	ENSG00000137414
-0.615952	6.08398	-5.91117	9.37956e-07	1.31314e-06	4.60854	PCF11-AS1	PCF11 antisense RNA 1	NA
-0.615468	7.0632	-3.93081	0.000371972	0.000380917	-1.304	RNU6-40P	RNA, U6 small nuclear 40, pseudogene	ENSG00000206981
-0.61544	6.269	-9.95929	7.51327e-12	5.66504e-11	16.4395	GDPD1	glycerophosphodiester phosphodiesterase domain containing 1	ENSG00000153982
-0.615426	7.06381	-10.6332	1.28651e-12	1.3696e-11	18.2281	STRBP	spermatid perinuclear RNA binding protein	ENSG00000165209
-0.615123	6.31019	-4.51317	6.6656e-05	7.18591e-05	0.377399	LOC100421160	structural maintenance of chromosomes 5 pseudogene	ENSG00000255437
-0.615051	7.33827	-4.24113	0.000149903	0.00015729	-0.417642	TAS2R15P	taste 2 receptor member 15 pseudogene	ENSG00000212125
-0.614776	8.46714	-5.59479	2.47575e-06	3.25221e-06	3.63983	UBE2B	ubiquitin conjugating enzyme E2 B	ENSG00000119048
-0.614764	8.93176	-8.9905	1.05325e-10	4.72113e-10	13.766	NLN	neurolysin	ENSG00000123213
-0.613182	6.61054	-13.4486	1.50297e-15	7.68016e-14	25.0766	CHODL	chondrolectin	ENSG00000154645
-0.613166	6.7361	-6.17188	4.22094e-07	6.36253e-07	5.40726	SFR1	SWI5 dependent homologous recombination repair protein 1	ENSG00000156384
-0.612969	8.43543	-8.36723	6.13294e-10	1.99614e-09	11.9845	GNAQ	G protein subunit alpha q	ENSG00000156052
-0.612918	7.33087	-7.35753	1.17224e-08	2.48555e-08	9.00737	LOC644656	uncharacterized LOC644656	ENSG00000268403
-0.612764	7.39838	-4.45701	7.88656e-05	8.4487e-05	0.212077	NUP50P2	nucleoporin 50 pseudogene 2	NA
-0.612416	8.47506	-8.64402	2.7881e-10	1.05535e-09	12.7813	ORC6	origin recognition complex subunit 6	ENSG00000091651
-0.612383	9.12651	-7.46855	8.42988e-09	1.88933e-08	9.33959	CLASP1	cytoplasmic linker associated protein 1	ENSG00000074054
-0.611936	7.5704	-3.74365	0.000637158	0.000643454	-1.82579	RPS12	ribosomal protein S12	ENSG00000112306
-0.611034	6.80441	-7.86213	2.64604e-09	6.93399e-09	10.5081	PTGR1	prostaglandin reductase 1	ENSG00000106853
-0.610895	7.82226	-5.62128	2.28249e-06	3.02948e-06	3.72085	ANKRD36	ankyrin repeat domain 36	ENSG00000135976
-0.609104	6.41031	-18.131	1.32788e-19	1.69637e-17	34.532	KCNN2	potassium calcium-activated channel subfamily N member 2	ENSG00000080709
-0.608121	8.94849	-5.33342	5.51758e-06	6.86006e-06	2.84207	NAE1	NEDD8 activating enzyme E1 subunit 1	ENSG00000159593
-0.607714	7.9294	-5.56971	2.67375e-06	3.47655e-06	3.56315	GXYLT1	glucoside xylosyltransferase 1	ENSG00000151233
-0.607452	8.56439	-7.84414	2.78894e-09	7.19773e-09	10.455	CSTF1	cleavage stimulation factor subunit 1	ENSG00000101138
-0.607432	6.37411	-9.98871	6.94761e-12	5.46189e-11	16.5188	SLC2A12	solute carrier family 2 member 12	ENSG00000146411
-0.606962	9.98679	-9.50474	2.55432e-11	1.43435e-10	15.2	NASP	nuclear autoantigenic sperm protein	ENSG00000132780
-0.606213	8.90682	-5.50564	3.25452e-06	4.16807e-06	3.36734	PRELID3B	PRELI domain containing 3B	ENSG00000101166
-0.606001	7.83297	-6.1937	3.94853e-07	6.02297e-07	5.47406	AUTS2	activator of transcription and developmental regulator AUTS2	ENSG00000158321
-0.603352	8.83588	-13.1897	2.68751e-15	1.14443e-13	24.4871	PICALM	phosphatidylinositol binding clathrin assembly protein	ENSG00000073921
-0.603287	10.3644	-7.41716	9.81845e-09	2.14411e-08	9.18594	EIF2S2P4	eukaryotic translation initiation factor 2 subunit 2 beta pseudogene 4	NA
-0.602723	7.47161	-7.58075	6.04852e-09	1.42433e-08	9.67421	CENPBD1	CENPB DNA-binding domain containing 1	ENSG00000177946
-0.602645	9.12521	-6.17386	4.19552e-07	6.35553e-07	5.41331	CCDC88A	coiled-coil domain containing 88A	ENSG00000115355
-0.602232	7.79933	-8.29323	7.58381e-10	2.3775e-09	11.7699	LEMD3	LEM domain containing 3	ENSG00000174106
-0.601443	6.0976	-6.53887	1.37805e-07	2.29376e-07	6.52934	HP11014	uncharacterized HP11014	NA
-0.601254	7.47397	-8.59121	3.23832e-10	1.1681e-09	12.63	PPP3CB	protein phosphatase 3 catalytic subunit beta	ENSG00000107758
-0.601117	9.2421	-7.00382	3.37712e-08	6.25257e-08	7.94223	PCM1	pericentriolar material 1	ENSG00000078674
-0.601032	5.92595	-6.8573	5.25123e-08	9.46192e-08	7.49835	GTF2IP6	general transcription factor IIi pseudogene 6	NA
-0.600665	8.42226	-6.19055	3.98664e-07	6.06302e-07	5.46444	RCN2	reticulocalbin 2	ENSG00000117906
-0.60051	6.42362	-12.0647	3.67876e-14	9.89394e-13	21.8329	ICA1L	islet cell autoantigen 1 like	ENSG00000163596
-0.600043	8.81378	-8.70364	2.35557e-10	9.25921e-10	12.9518	DNAJA2	DnaJ heat shock protein family (Hsp40) member A2	ENSG00000069345
-0.599291	6.75019	-8.25812	8.38946e-10	2.57982e-09	11.6679	SBF2-AS1	SBF2 antisense RNA 1	ENSG00000246273
-0.59916	7.19361	-4.54971	5.97335e-05	6.48064e-05	0.485259	LOC107985352	uncharacterized LOC107985352	NA
-0.598894	7.31941	-7.20873	1.82697e-08	3.67552e-08	8.56049	COX10-AS1	COX10 antisense RNA 1	ENSG00000236088
-0.598695	9.21997	-4.60859	5.00403e-05	5.48725e-05	0.659567	NCAPG	non-SMC condensin I complex subunit G	ENSG00000109805
-0.598513	9.04846	-3.84752	0.000473112	0.000481594	-1.53749	HIPK2	homeodomain interacting protein kinase 2	ENSG00000064393
-0.59844	8.14783	-7.5919	5.8527e-09	1.3846e-08	9.70739	RPP30	ribonuclease P/MRP subunit p30	ENSG00000148688
-0.598281	7.72937	-5.6078	2.37889e-06	3.13302e-06	3.67961	VEZT	vezatin, adherens junctions transmembrane protein	ENSG00000028203
-0.597747	8.28175	-8.85906	1.52104e-10	6.42356e-10	13.3942	LRP6	LDL receptor related protein 6	ENSG00000070018
-0.597607	9.18351	-10.7656	9.16032e-13	1.10345e-11	18.5724	RBMS3	RNA binding motif single stranded interacting protein 3	ENSG00000144642
-0.597485	7.43852	-10.3124	2.95849e-12	2.69963e-11	17.384	NUP50	nucleoporin 50	ENSG00000093000
-0.596932	7.8982	-8.26978	8.1127e-10	2.51248e-09	11.7018	LNPK	lunapark, ER junction formation factor	ENSG00000144320
-0.596776	6.12515	-3.76853	0.000593449	0.0006005	-1.75704	NAIPP4	NAIP pseudogene 4	NA
-0.596358	6.40908	-11.7232	8.39083e-14	1.78655e-12	20.9965	ZNF542P	zinc finger protein 542, pseudogene	ENSG00000240225
-0.595395	7.22029	-6.03677	6.38291e-07	9.26611e-07	4.99338	C20orf96	chromosome 20 open reading frame 96	ENSG00000196476
-0.595385	7.86249	-6.00772	6.97707e-07	1.00148e-06	4.90436	C17orf75	chromosome 17 open reading frame 75	ENSG00000108666
-0.595355	7.48388	-6.05324	6.06897e-07	8.8607e-07	5.04383	DCLRE1A	DNA cross-link repair 1A	ENSG00000198924
-0.595183	7.99047	-4.43499	8.42304e-05	8.98575e-05	0.147435	ZC3HAV1L	zinc finger CCCH-type containing, antiviral 1 like	ENSG00000146858
-0.595133	7.21005	-13.9819	4.64819e-16	3.39318e-14	26.2668	EIF4E3	eukaryotic translation initiation factor 4E family member 3	ENSG00000163412
-0.595124	6.53623	-9.60788	1.9305e-11	1.16057e-10	15.4835	LINC01625	long intergenic non-protein coding RNA 1625	ENSG00000238099
-0.594969	8.25992	-7.10975	2.4571e-08	4.82915e-08	8.26222	SGPL1	sphingosine-1-phosphate lyase 1	ENSG00000166224
-0.594639	8.48265	-4.79901	2.81515e-05	3.21103e-05	1.22693	CDC7	cell division cycle 7	ENSG00000097046
-0.594494	6.28887	-7.29507	1.41187e-08	2.91065e-08	8.82002	THAP9	THAP domain containing 9	ENSG00000168152
-0.59413	8.46798	-7.86838	2.59813e-09	6.84354e-09	10.5266	RAB5A	RAB5A, member RAS oncogene family	ENSG00000144566
-0.593936	8.41038	-4.99637	1.5454e-05	1.8154e-05	1.82008	TIA1	TIA1 cytotoxic granule associated RNA binding protein	ENSG00000116001
-0.593878	9.11711	-6.23137	3.51897e-07	5.43261e-07	5.58941	RANBP2	RAN binding protein 2	ENSG00000153201
-0.59287	8.65017	-4.09409	0.000231122	0.000239075	-0.840645	AASDHPPT	aminoadipate-semialdehyde dehydrogenase-phosphopantetheinyl transferase	ENSG00000149313
-0.592137	7.8213	-4.63888	4.56773e-05	5.06315e-05	0.749436	ETNK1	ethanolamine kinase 1	ENSG00000139163
-0.592119	6.91282	-8.05295	1.51784e-09	4.33306e-09	11.0691	ZNF566	zinc finger protein 566	ENSG00000186017
-0.591507	8.08775	-7.65236	4.89696e-09	1.16932e-08	9.88717	NAB1	NGFI-A binding protein 1	ENSG00000138386
-0.591154	10.3127	-12.7522	7.3041e-15	2.666e-13	23.4729	C1QBP	complement C1q binding protein	ENSG00000108561
-0.591049	6.27676	-7.97249	1.91773e-09	5.29709e-09	10.833	ZNF596	zinc finger protein 596	ENSG00000172748
-0.590796	7.01619	-6.31133	2.75646e-07	4.34738e-07	5.83409	ZBTB8A	zinc finger and BTB domain containing 8A	ENSG00000160062
-0.590297	9.24157	-4.74871	3.27833e-05	3.69808e-05	1.07654	NCBP2AS2	NCBP2 antisense 2 (head to head)	ENSG00000270170
-0.5899	9.16504	-5.83417	1.18779e-06	1.63161e-06	4.37262	XRCC1	X-ray repair cross complementing 1	ENSG00000073050
-0.589868	7.52907	-8.4531	4.79766e-10	1.59913e-09	12.2326	TRMT2B	tRNA methyltransferase 2 homolog B	ENSG00000188917
-0.589833	7.52537	-8.55843	3.55422e-10	1.25256e-09	12.5359	MTURN	maturin, neural progenitor differentiation regulator homolog	ENSG00000180354
-0.589328	7.6841	-7.44272	9.10106e-09	2.00459e-08	9.26239	IFNGR1	interferon gamma receptor 1	ENSG00000027697
-0.588924	7.5569	-5.16868	9.13439e-06	1.11667e-05	2.34136	LOC728554	THO complex 3 pseudogene	ENSG00000170089
-0.586821	9.3077	-8.31436	7.13722e-10	2.26529e-09	11.8312	CNOT6	CCR4-NOT transcription complex subunit 6	ENSG00000113300
-0.586547	6.08953	-16.3923	3.34238e-18	3.41591e-16	31.2682	LPL	lipoprotein lipase	ENSG00000175445
-0.58652	5.5311	-3.60889	0.000933638	0.000941004	-2.19458	LOC644383	heat shock transcription factor 2 pseudogene	NA
-0.586472	6.1776	-18.8135	4.00566e-20	1.30165e-17	35.7432	ZC3H12B	zinc finger CCCH-type containing 12B	ENSG00000102053
-0.586008	7.22985	-7.83715	2.84654e-09	7.30946e-09	10.4344	ZBTB26	zinc finger and BTB domain containing 26	ENSG00000171448
-0.585676	5.79377	-9.0384	9.21731e-11	4.2054e-10	13.9009	MGAT4A	alpha-1,3-mannosyl-glycoprotein 4-beta-N-acetylglucosaminyltransferase A	ENSG00000071073
-0.58538	8.3735	-7.08256	2.66583e-08	5.08299e-08	8.18017	AKIRIN2	akirin 2	ENSG00000135334
-0.585231	7.32579	-8.20606	9.74714e-10	2.89581e-09	11.5164	NFE2L3	nuclear factor, erythroid 2 like 3	ENSG00000050344
-0.584786	7.13059	-9.87313	9.45514e-12	6.35733e-11	16.2066	GNAZ	G protein subunit alpha z	ENSG00000128266
-0.584591	8.42558	-5.56284	2.73073e-06	3.53266e-06	3.54214	NCOA6	nuclear receptor coactivator 6	ENSG00000198646
-0.584581	8.73031	-7.65859	4.80783e-09	1.15343e-08	9.90569	MAGEF1	MAGE family member F1	ENSG00000177383
-0.584072	6.48222	-5.34769	5.28156e-06	6.58263e-06	2.88554	ADGRF5P1	adhesion G protein-coupled receptor F5 pseudogene 1	ENSG00000227582
-0.583822	10.1218	-10.3745	2.51567e-12	2.38057e-11	17.5483	KDM1A	lysine demethylase 1A	ENSG00000004487
-0.583438	6.53759	-9.90838	8.60538e-12	6.19345e-11	16.302	GATM	glycine amidinotransferase	ENSG00000171766
-0.583415	6.24228	-13.0402	3.77227e-15	1.48279e-13	24.1432	UNC79	unc-79 homolog, NALCN channel complex subunit	ENSG00000133958
-0.582839	9.77224	-8.54314	3.71212e-10	1.29924e-09	12.4919	TMPO	thymopoietin	ENSG00000120802
-0.582462	5.90371	-10.5257	1.69797e-12	1.77074e-11	17.9468	DLX6-AS1	DLX6 antisense RNA 1	NA
-0.582405	7.43547	-5.67639	1.92742e-06	2.5783e-06	3.88946	ERCC8	ERCC excision repair 8, CSA ubiquitin ligase complex subunit	ENSG00000049167
-0.582189	7.63648	-4.64875	4.43376e-05	4.92533e-05	0.778771	PBDC1	polysaccharide biosynthesis domain containing 1	ENSG00000102390
-0.582102	7.03084	-5.54248	2.90675e-06	3.74143e-06	3.4799	GEMIN2	gem nuclear organelle associated protein 2	ENSG00000092208
-0.581264	7.92315	-9.37493	3.64076e-11	1.90755e-10	14.8411	HDGFL3	HDGF like 3	ENSG00000166503
-0.581012	6.25434	-10.9205	6.17306e-13	8.30114e-12	18.9726	MPV17L	MPV17 mitochondrial inner membrane protein like	ENSG00000156968
-0.580668	6.86737	-5.99786	7.19102e-07	1.02643e-06	4.87415	PCBD2	pterin-4 alpha-carbinolamine dehydratase 2	ENSG00000132570
-0.580223	7.56175	-8.58452	3.30034e-10	1.17935e-09	12.6108	ZFP1	ZFP1 zinc finger protein	ENSG00000184517
